# Supplementary material for: LymphoML: An interpretable artificial intelligence-based method identifies morphologic features that correlate with lymphoma subtype
Source: medRxiv preprint, doi:10.1101/2023.03.14.23287143, version 1 (2023-03-17)
Supplement: Supplementary Table 2 [file 287143_file04.xlsx]

## Sheet: Sheet1
TMA ID	Case	INCAN Final Diagnosis	Stanford Diagnosis	INCAN/Stanford concordance	2017 WHO Diagnosis	Lymphoma Bin based on 2017 WHO Diagnosis	CD45	CD3	CD20	PAX5	CD10	BCL6	MUM1	BCL2	c-MYC	Ki67 (%)	TdT	EBV ISH	EBV-LMP	HHV-8	CD5	BCL1	SOX11	LEF1	HGAL	LMO2	MNDA	CD43	CD138	CD30	CD15	ALK-1	OCT_2	CD2	TCR-beta	TCR-delta	CD4	FOXP3	CD25	PD-1	CXCL13	CD8	CD56	TIA	Granzyme B	Perforin	H3K27me3	CD21	CD23
1	E0003 B	Hodkgin Lymphoma	cHL, TCL, THRLBCL	FULL	Classic Hodgkin Lymphoma	HL	1	1	1	1	1	3	3 (dim)	1	2	0	1	3	1	1	1	1	1	3 (dim)	1	1	1	1	1	2	3	1	2	1	1	1	1	1	1	1	1	1	0	1	1	1	3	1	1
1	E0004 B	B Follicular Lymphoma, grade III	FL (1-2)	PARTIAL	Follicular lymphoma, grade 1-2	FL	3	1	3	3	3	3	1	3	2	<5%	1	1	1	1	1	1	1	1	3	3	1	1	1	1	1	1	3	1	1	1	1	1	1	1	1	1	0	1	1	1	3	1	1
1	E0005 B	Diffuse Large B cell Lymphoma	necrosis, NK/T, DLBCL	FULL	Diffuse large B cell lymphoma, NOS	DLBCL	0	0	3	0	0	1	0	0	0	0	1	1	1	1	1	1	1	1	1	1	0	2	1	1	0	1	2	1	1	1	1	1	1	1	1	1	0	0	1	1	0	1	1
1	E0006 B	Diffuse Large B cell Lymphoma	HGBL, DL	FULL	Diffuse large B cell lymphoma, germinal center type	DLBCL	3	1	3	3	1	3	2	3	3	0.1	1	1	1	1	2	1	1	0	0	1	0	1	1	1	1	1	3	1	1	1	1	1	1	1	1	1	0	1	1	1	3	1	1
1	E0007 B	Diffuse Large cell Lymphoma	DL	FULL	Diffuse large B cell lymphoma, germinal center type	DLBCL	3	1	3	3	2	3	2	3	2	0.25	1	1	1	1	3	1	1	2	1	1	1	1	1	1	1	1	3	1	1	1	1	1	3	1	1	1	1	1	1	1	3	1	1
1	E0008 C	MALT lymphoma	DL	NONE	Diffuse large B cell lymphoma, non-germinal center type	DLBCL	3	1	3	3	1	1	1	3	2	0.5	1	1	1	1	3	1	1	3	1	1	1	3	1	1	1	1	3	1	1	1	1	1	1	1	1	1	1	1	2	1	3	1	1
1	E0009 A	Non-typified lymphoma	I	NONE	Diffuse large B cell lymphoma, germinal center type	DLBCL	3	1	3	3	1	3	1	3	2	0.05	1	1	1	1	1	1	1	1	3	3	1	3	1	2	1	1	3	1	1	1	1	1	1	1	1	1	1	1	1	1	3	1	1
1	E0010 B		DL	N/A	Diffuse large B cell lymphoma, non-germinal center type	DLBCL	3	1	3	3	1	1	1	3	1	0	1	1	1	1	1	1	1	1	1	1	1	1	1	1	1	1	3	1	1	1	1	1	1	1	1	1	1	1	1	1	1	1	1
1	E0011 B	Non-Hodgkin's lymphoma	small plasmcytoid: MZL, LPL	PARTIAL	Follicular lymphoma, grade 1-2	FL	3	1	3	3	3	2	1	3	1	0.05	1	1	1	1	1	1	1	1	1	1	1	1	1	1	1	1	3	1	1	1	1	1	1	1	1	1	1	1	1	1	3	1	1
1	E0015 B		DL	N/A	Diffuse large B cell lymphoma, non-germinal center type	DLBCL	3	1	3	3	1	3	3	3	2	0.1	1	1	1	1	3	1	1	3	1	1	1	1	1	1	1	1	3	1	1	1	1	1	3	1	1	1	1	1	1	1	3	1	1
1	E0016 B	DLBCL	NK/T	FULL	Diffuse large B cell lymphoma, germinal center type	DLBCL	3	1	3	3	3	3	1	1	2	0	1	3	1	1	1	1	1	2	1	3	1	3	1	1	1	1	3	1	1	1	1	1	1	1	1	1	1	1	1	1	3	1	1
1	E0017 B	Large cell Lymphoma	PTCL, ALCL, ATLL	PARTIAL	Peripheral T cell lymphoma, NOS	TCL	3	3	1	1	1	1	1	3	3 (dim)	<5%	1	3	1	1	3	1	1	3	1	1	1	3	1	3 (strong)	1	1	1	3	3	1	3	1	1	1	1	1	1	1	2	1	3	1	1
1	E0021 A	Mantle-cell lymphoma	Mantle, FL, MZL	FULL	Mantle cell lymphoma	MCL	3	1	3	3	1	1	1	3	1	0.05	1	1	1	1	3	3	3	1	1	1	1	3 (dim)	1	1	1	1	3	1	1	1	1	1	1	1	1	1	1	1	1	1	3	1	2
1	E0023 B	Follicular Lymphoma	FL w/transformation?	PARTIAL	Diffuse large B cell lymphoma, germinal center type	DLBCL	3	1	3	3	3	1	1	3	1	0	1	1	1	1	1	1	1	1	3	1	1	1	1	1	1	1	3	1	1	1	1	1	1	1	1	1	1	1	1	1	1	1	1
1	E0024 B	Diffuse B cell Non-Hodgkin Lymphoma	DL	FULL	Diffuse large B cell lymphoma, non-germinal center type	DLBCL	3	1	3	1	1	1	1	0	1	0	1	1	1	1	1	1	1	1	1	1	1	0	1	1	1	1	3	1	1	0	1	1	1	1	1	1	1	1	1	1	1	1	1
1	E0025 B	Diffuse Large B cell Lymphoma	DL or HGBCL	FULL	Diffuse large B cell lymphoma, non-germinal center type	DLBCL	3	1	3	3	1	3	3	3	2	0.1	1	1	1	1	1	1	1	3 (dim)	3	3 (dim)	1	3	1	1	1	1	3	1	1	1	1	1	1	1	1	1	1	1	1	1	3	1	1
1	E0026 B	Classic mantle-cell lymphoma	Mantle, CLL/SLL, MZL	FULL	Mantle cell lymphoma	MCL	3	1		3	1	1	1	3	2	0.05	1	1	1	1	3	3	3	1	1	1	1	3	1	1	1	1	3	1	1	1	1	1	1	1	1	1	1	1	1	1	3	1	1
1	E0027 B	Lymphoproliferative process	DL	NONE	High grade B cell lymphoma with MYC and BCL2 or BCL6 rearrangements	DLBCL	3	1	3	3	3	3	1	1	3	0.75	1	1	1	1	1	1	1	3	3	1	1	1	1	1	1	1	3	1	1	1	1	1	1	1	1	1	1	1	1	1	2	1	1
1	E0028 B	Lymphocyte-rich Classic Hodgkin disease	cHL	FULL	Classic Hodgkin Lymphoma	HL	1	1	1	3 (dim)	1	3	3 (dim)	2	3 (dim)	0.5	1	3	2	1	1	1	1	3 (dim)	2	1	1	1	1	3	2	1	2 (dim)	1	1	1	1	1	1	1	1	1	1	1	1	1	3	1	1
1	E0029 B	Low grade B cell Lymphoma	histiocytic: NLPHL, Rosai-Dorfman, LP-cHL	NONE	Peripheral T cell lymphoma, NOS	TCL	3	3	1	1	3	1	1	3	0	0.25	1	1	1	1	2 (dim)	1	1	2	2	2	1	2	1	2	1	1	0	2	1	1	2	1	1	1	3	1	1	1	1	1	3	1	3
1	E0030 B	Mantle-cell lymphoma	Mantle, CLL/SLL, MZL	FULL	Mantle cell lymphoma	MCL	3	1	3	3	1	1	1	3	1	0.25	1	1	1	1	3	3	1	1	1	1	1	3	1	1	1	1	3 (dim)	1	1	1	1	1	3 (dim)	1	1	1	1	1	1	1	3d	1	2
1	E0031 B	Large B cell lymphoma	DL	FULL	Diffuse large B cell lymphoma, non-germinal center type	DLBCL	3	1	3	3	1	3	3	3	2	0.25	1	1	1	1	1	1	1	2	3	3	2	3	1	1	1	1	3	1	1	1	1	1	1	1	1	1	1	2	1	1	3	1	1
1	E0032 B	Diffuse Large cell Lymphoma	PBL, DL	FULL	Diffuse large B cell lymphoma, non-germinal center type	DLBCL	3	1	3	3	1	1	3	3	2	N/A	1	1	1	1	1	1	1	3	3	1	1	3	1	1	1	1	3	1	1	1	1	1	3	1	1	1	1	1	1	1	3	1	1
1	E0034 C	Non-Hodgkin Lymphoma	FL (1-2)	PARTIAL	Follicular lymphoma, grade 1-2	FL	3	1	3	3	3	2	2	3	2	0.25	1	1	1	1	1	1	1	3 (dim)	3	1	1	1	1	1	1	1	3	1	1	1	1	1	1	1	1	1	1	1	1	1	3	1	1
1	E0035 B	Aggressive b cell non-hodgkin lymphoma	large TCL/BCL (cutaneous)	FULL	Diffuse large B cell lymphoma, germinal center type	DLBCL	3	1	3	3	3	3	3	3	2	0.25	1	1	1	1	1	1	1	1	2	3	3	3	1	2	1	1	3	1	1	1	1	2	2	1	2	1	1	1	1	1	3	1	1
1	E0036 C	Nasal T/NK-cell lymphoma (indolent)	large TCL/BCL	FULL	NK/T cell lymphoma	NKTCL	2	3	1	1	1	1	3 (dim)	3	2	<5%	1	3	1	1	2	1	1		1	1	2	3	1	3	1	1	2	2	1	1	2	1	1	1	1	2	3 (dim)	1	3	1	3	1	1
1	E0037 C	Lymphoid hyperplasia, likely Lymphoma	PTCL, B cell lymphoma	NONE	Diffuse large B cell lymphoma, germinal center type	DLBCL	3		3	3	3	3	1	3	1	0.1	1	1	1	1	1	1	1	1	3	3	1	3	1	1	1	1	3	1	1	1	1	1	1	1	1	1	1	1	1	1	3	1	3
1	E0038 B	Diffuse Small B cell Lymphoma	DL	NONE	Diffuse large B cell lymphoma, non-germinal center type	DLBCL	3	1	3	3	0	3	3	0	0	0	1	1	1	1	3	1	1	1	0	1	1	0	1	1	1	1	3	1	1	1	1	1	0	1	1	1	1	1	1	1	3	1	1
1	E0041 B	lymphoma intermediate between DLBCL and BL	HGBL, DL	FULL	Diffuse large B cell lymphoma, non-germinal center type	DLBCL	0	1	3	3	0	3	3	1	2	0.75	1	1	1	1	1	1	1	3 (dim)	1	3	1	3 (dim)	1	1	1	1	3	1	1	1	1	1	2	1	1	1	1	1	1	1	3	1	1
1	E0042 C	Metastatic adenocarcinoma	DL	NONE	Diffuse large B cell lymphoma, non-germinal center type	DLBCL	0	1	3	3	1	1	1	1	1	0	1	1	1	1	1	1	1	1	1	1	1	1	1	1	1	1	3 (mod)	1	1	1	1	1	1	1	1	1	1	1	1	1	1	1	1
1	E0043 A	Follicular hyperplasia/lymphoma	FL, MZL	PARTIAL	Marginal zone lymphoma	MZL	3		3	3	2	1	2	3	2	0.1	1	1	1	1	1	1	1	1	1	1	3	3	1	1	1	1	3	1	1	1	1	1	1	1	1	1	1	1	1	1	3	1	1
1	E0044 B	Diffuse Large cell Lymphoma	DL	FULL	High grade B cell lymphoma with MYC and BCL2 or BCL6 rearrangements	DLBCL	3	1	3	3	1	3	0	0	3	0.5	1	1	1	1	1	1	1	1	3	1	1	1	1	1	1	1	3	1	0	1	1	1	1	1	1	1	1	1	1	1	3	1	1
1	E0046 B	Diffuse Large B Cell Lymphoma	medium B ?T (ML, DL)	FULL	Diffuse large B cell lymphoma, non-germinal center type	DLBCL	3	1	3	1	1	1	1	3	1		1	2		1	1	1	1	1	1	1	1	1	1	1	1	1	2 (dim)	1	1	1	1	1	1	1	2	1	1	1	1	1	3	1	1
1	E0048 B	Non-Hodgkin Lymphoma	DL, PTCL	PARTIAL	Diffuse large B cell lymphoma, non-germinal center type	DLBCL	0	1	3	3 (dim)	1	1	3	3	2	0.25	1	1	1	1	1	1	1	3 (dim)	1	1	1	3	1	3	1	1	3 (mod)	1	1	1	1	1	1	1	1	1	1	1	1	1	3	1	1
1	E0050 B	Diffuse Large B cell Lymphoma	DL	FULL	Diffuse large B cell lymphoma, non-germinal center type	DLBCL	3	1	3	1	1	1	1	2	1	0	1	1	1	1	1	1	1	1	1	1	1	1	1	1	1	1	3	1	1	1	1	1	1	1	1	1	2 (dim)	1	1	1	3	1	1
1	E0053 C	Diffuse Large B cell Lymphoma	ML, SLL, small B	PARTIAL	Follicular lymphoma, grade 1-2	FL	3	1	3	3	3	3	1	2	2	0.25	1	1	1	1	1	1	1	1	3	1	1	1	1	1	1	1	3	1	1	1	1	1	1	1	1	1	1	1	1	1	3	1	1
1	E0058 B	Nodular sclerosing Hodgkin lymphoma	large TCL, BCL, cHL	FULL	Classic Hodgkin Lymphoma	HL	?	1	1	3 (dim)	1	1	2	2	1	0	1	1	1	1		1	1	3 (dim)	1	1	1	3	1	3	1	1	1	1	1	1	1	1	1	1	1	1	1	1	1	1	3	1	1
1	E0061 B	Follicular Lymphoma grade II	DL	PARTIAL	Diffuse large B cell lymphoma, germinal center type	DLBCL	3	1	3	3	1	2	2	3	1	<5%	1	3	1	1	1	1	1	1	3	3	1	1	1	3 (strong)	1	1	3	1	1	1	1	1	1	1	3	1	1	1	1	1	3	1	1
1	E0066 B	Diffuse Large B cell Lymphoma	PTCL, DL, cHL	NONE	Nodal peripheral T cell lymphoma with T follicular helper phenotype	TCL	3	3	3 (dim subset?)	3 (dim)	2	2	3	1	2	<5%	1	1	1	1	1	1	1	3 (dim)	2	3	1	3	1	3	1	1	3 (dim)	3	1	1	3	1	2	2	3	1	1	1	1	1	0	1	1
1	E0067 B	Non-Hodgkin Lymphoma	FL (1-2)	PARTIAL	Follicular lymphoma, grade 1-2	FL	3	1	3	3	3	2	1	3	2	0.05	1	1	1	1	1	1	1	1	3	3	1	1	1	1	1	1	3	1	1	1	1	1	1	1	1	1	1	1	1	1	3	1	1
1	E0069 B	Diffuse Large B cell Lymphoma	DL	FULL	Diffuse large B cell lymphoma, germinal center type	DLBCL	3	1	3	3	1	3	1	2	2	0.25	1	1	1	1	1	1	1	1	3	3	1	3	1	1	1	1	3	1	1	1	1	1	2	1	1	1	1	1	2	1	3	1	1
1	E0071 C	Mixed cellularity Hodgkin Lymphoma	cHL	FULL	Classic Hodgkin Lymphoma	HL	1	1	1	3 (dim)	1	1	3	3	2	0.05	1	1	1	1	1	1	1	3 (dim)	2	1	1	0	1	3	3	1	2 (dim)	1	1	1	1	1	0	1	1	1	1	1	1	1	3	1	1
1	E0075 B	Follicular Lymphoma Grade I	DL	PARTIAL	Diffuse large B cell lymphoma, germinal center type	DLBCL	3 (dim)	1	3	3	3	3	2	2	2	0.1	1	1	1	1	1	1	1	1	3	3	1	3	1	1	1	1	3	1	1	1	1	1	2	1	1	1	1	1	1	1	3	1	1
1	E0077 B	Mantle Lymphoma	ML, SLL, small B	FULL	Mantle cell lymphoma	MCL	3	1	3	3	1	1	1	3	2	0.1	1	1	1	1	3	3	3	1	1	1	1	3	1	1	1	1	3	1	1	1	1	1	3	1	1	1	1	1	1	1	3	1	1
1	E0078 B	Classic Mantle Lymphoma	DL	PARTIAL	Diffuse large B cell lymphoma, non-germinal center type	DLBCL	3	1	3	3	1	3	3	3	2	0.05	1	1	1	1	3	1	1	3 (dim)	3	1	1	3	1	1	1	1	3 (mod)	1	1	1	1	1	3 (dim)	1	1	1	0	1	1	1	3	1	1
1	E0080 B	Diffuse Large B Cell Lymphoma	anaplastic PTCL, LBCL	FULL	Diffuse large B cell lymphoma, germinal center type	DLBCL	3	1	3	3	1	3	1	2	3	0.5	1	1	1	1	1	1	1	3	2	3	2	0	1	3	1	1	3	1	1	1	1	1	1	2	1	1	1	1	1	1	3	1	1
1	E0081 C	Non-Hodgkin Lymphoma	cHL, TCL	NONE	Classic Hodgkin Lymphoma	HL	1	1	1	3 (dim)	1	3	3	1	3	0.75	1	1	1	1	1	1	1	3 (dim)	1	1	1	1	1	3	3	1	2 (dim)	1	1	1	1	1	1	1	1	1	1	1	1	1	3	1	1
1	E0082 B	Diffuse Large B Cell Lymphoma	DL	FULL	Diffuse large B cell lymphoma, non-germinal center type	DLBCL	3	1	3	3	1	3	3	2	2	0.25	1	1	1	1	1	1	1	3 (dim)	3	2	3 (dim)	2	1	3	1	1	3	1	1	1	1	1	3	1	1	1	1	1	1	1	3	1	1
1	E0083 B	Mixed cellularity Hodgkin disease	cHL	FULL	Classic Hodgkin Lymphoma	HL	1	1	1	3 (dim)	1	3	3	1	2	0.75	1	3	3	1	1	1	1	3 (mod)	2	1	1	1	1	3	2	1	2 (dim)	1	1	1	1	1	1	1	1	1	1	1	3	1	0	1	1
1	E0085 B	Lymphoma	ALCL, DL	PARTIAL	Anaplastic large cell lymphoma, ALK positive	TCL	1	1	1	1	1	1	3 (dim)	2	2	0.75	1	2	1	1	1	3	1	1	1	1	1	3 (dim)	1	3 (strong)	1	3 (cyto)	1	1	2	1	3	1	3	1	2	1	1	1	3	1	1	1	1
1	E0086 B	thymic lymphoma	small to medium sized B cell, ?DL	NONE	Marginal zone lymphoma	MZL	3	1	3	3	1	1	1	3	1	<5%	1	0	1	1	1	1	1	1	1	1	1	3	1	1	1	1	3	1	1	1	1	1	1	1	1	1	1	1	1	1	0	1	1
1	E0087 B	DLBCL	ML, SLL	NONE	B lymphoblastic lymphoma	Agg BCL	3	1	3	3	3	1	1	3	3	0.5	3	1	1	1	1	1	1	3	1	3	1	3	1	1	1	1	2 (dim)	1	1	1	1	1	1	1	1	1	1	1	1	1	3	1	1
1	E0088 B	High grade Diffuse Large B-cell Lymphoma	DL	FULL	Diffuse large B cell lymphoma, non-germinal center type	DLBCL	3	1	3	3	1	1	1	0	2	NA	1	1	1	1	1	1	1	1	1	1	1	1	1	2	1	1	3	1	1	1	1	1	1	1	1	1	1	1	1	1	1	1	1
1	E0089 B	Lymphoid Lymphoma	DL	PARTIAL	Diffuse large B cell lymphoma, non-germinal center type	DLBCL	3	1		3	1	3 (dim)	3	3	2	<5%	1	1	1	1	1	1	1	1	3	1	1	3	2	2	1	1	3	1	1	1	1	1	1	1	1	1	1	1	1	1	2	1	1
1	E0091 B	Mixed cellularity Hodgkin disease	cHL	FULL	Classic Hodgkin Lymphoma	HL	1	1	1	3 (dim)	1	3	3	1	3	0.5	1	3	3	1	1	1	1	3 (mod)	2	1	1	1	1	3	3	1	2 (dim)	1	1	1	1	1	3	1	1	1	1	1	1	1	3	1	1
1	E0094 C	Anaplastic T Lymphoma	DL	NONE	Diffuse large B cell lymphoma, non-germinal center type	DLBCL	3	1	3	3	1	3	3	2	2	0.1	1	1	1	1	1	1	1	1	1	3	2 (dim)	1	1	3	1	1	3	1	1	1	1	1	1	1	1	1	1	1	1		3	1	1
1	E0095 B	Hodgkin Lymphoma Nodular sclerosis type	cHL, PTCL	N/A	Classic Hodgkin Lymphoma	HL	3	3	0	3	1	3	3	3	3	0.75	1	3	2	1	1	1	1	3 (bright)	3	1	1		1	1	2	1	3 (dim)	3	2	1	3	1	1	1	1	2	1	1	2	1	3	1	1
1	E0096 B	Mixed cellularity Classic Hodgkin disease	NLP Hodgkin, cHL	FULL	Classic Hodgkin Lymphoma	HL	3	1	1	3 (dim)	1	3		1	3	0.5	1	3	2	1		1	1	3 (dim)	3				1	3	2	1	3	3	1	1	2	1	1	1	1	1	1	1	1	1	2	1	2
1	E0097 B	B Cell Mantle Lymphoma	blastic ML, DL	FULL	Mantle cell lymphoma	MCL	3	1	3	3	1	1	2	3	2	0.1	1	1	1	1	3	3	3	1	1	1	1	3	1	1	1	1	3	1	1	1	1	1	2 (dim)	1	1	1	1	1	1	1	3	1	1
1	E0098 B	DLBCL (NK/T cell lymphoma - indolent)	PTCL, DL	NONE	NK/T cell lymphoma	NKTCL	1	3	1	1	1	1	2	2	2	0.25	1	3	1	1	1	1	1	1	1	1	1	3	1	3	1	1	1	3	1	3	1	1	1	1	1	1	1	3	3	2	3	1	1
1	E0099 B	Large B-Cell Lymphoma and Burkitt Lymphoma	DL	FULL	Diffuse large B cell lymphoma, germinal center type	DLBCL	3	1	3	0	3	3	1	1	0	NA	1	3	1	1	0	1	1	0	3	0	0	3	1	1	1	1	3	1	1	1	0	1	1	1	1	1	1	1	0	1	3	1	1
1	E0100 B	Small B lymphocytic lymphoma	PBL, plasmacytoma, DL	NONE	Diffuse large B cell lymphoma, non-germinal center type	DLBCL	3	1	3	3	1	3	3	3	2	0	1	1	1	1	1	1	1	1	0	1	1	1	1	1	1	1	3	1	1	1	1	1	3	1	1	1	1	1	1	1	3	1	1
1	E0102 C	Mantle Lymphoma	DL	PARTIAL	Mantle cell lymphoma	MCL	3	1	3	3	2	1	3	3	2	0.75	1	0	1	1	3	3	3	1	1	1	1	3	1	1	1	1	3	1	1	1	1	1	3	1	1	1	1	1	1	1	2	1	1
1	E0103 B	B Cell Mantle Lymphoma	ML, CLL/SLL	FULL	Mantle cell lymphoma	MCL	3	1	3	3	1	1	1	3	1	<5%	1	0	1	1	3	3	3 (dim)	1	1	1	1	3 (dim)	1	1	1	1	3 (dim)	1	1	1	1	1	3	1	1	1	1	1	1	1	3	1	2
1	E0104 B	Large B-cell Lymphoma	DL, PBL	FULL	Diffuse large B cell lymphoma, non-germinal center type	DLBCL	3	1	3	3	1	3	3	1	2	0.3	1	1	1	1	3	1	1	3 (dim)	1	1	1	3	1	1	1	1	3	1	1	1	1	1	3	1	1	3	1	1	3	1	3	1	1
2	E0054 B	Non-Hodgkin lymphoma	FL grade 1-2	PARTIAL	Follicular lymphoma, grade 1-2	FL	3	1	3	3	3	2	1	3	0	<1%	1	1	1	1	1	1	0	1	3	1	1	1	1	1	1	1	3	1	1	1	1	1	1	1	1	1	1	1	1	1	1	1	1
2	E0056 B	Diffuse large B cell lymphoma	cHL, PTCL, DL	FULL	Diffuse large B cell lymphoma, germinal center type	DLBCL	3	1	3	3	3	2	1	3	0	<1%	1	1	1	1	1	1	0	1	3	1	1	1	1	1	1	1	3	1	1	1	1	1	1	1	1	1	1	1	1	1	1	1	1
2	E0059 C	Diffuse large B cell lymphoma	DL	FULL	Diffuse large B cell lymphoma, non-germinal center type	DLBCL	3	1	3	3	3	2	1	3	0	<1%	1	1	1	1	1	1	0	1	3	1	1	1	1	1	1	1	3	1	1	1	1	1	1	1	1	1	1	1	1	1	1	1	1
2	E0060 B	Anaplastic large cell lymphoma, ALK1+	DL transformed from cutaneous FL	NONE	Diffuse large B cell lymphoma, NOS	DLBCL	3	1	3	3	3	2	1	3	0	<1%	1	1	1	1	1	1	0	1	3	1	1	1	1	1	1	1	3	1	1	1	1	1	1	1	1	1	1	1	1	1	1	1	1
2	E0062 (E0090 C)	Diffuse large B cell lymphoma	NK/T, DL	FULL	Diffuse large B cell lymphoma, non-germinal center type	DLBCL	3	1	3	3	3	2	1	3	0	<1%	1	1	1	1	1	1	0	1	3	1	1	1	1	1	1	1	3	1	1	1	1	1	1	1	1	1	1	1	1	1	1	1	1
2	E0065 B	Lymphocytic B Lymphoma	MZL, ML, small B	NONE	Mantle cell lymphoma	MCL	3	1	3	3	3	2	1	3	0	<1%	1	1	1	1	1	1	0	1	3	1	1	1	1	1	1	1	3	1	1	1	1	1	1	1	1	1	1	1	1	1	1	1	1
2	E0074 B	Mantle B cell Lymphoma	ML, MZL, small B	FULL	Mantle cell lymphoma	MCL	3	1	3	3	3	2	1	3	0	<1%	1	1	1	1	1	1	0	1	3	1	1	1	1	1	1	1	3	1	1	1	1	1	1	1	1	1	1	1	1	1	1	1	1
2	E0076 B	Anaplastic Lymphoma	DL	NONE	Diffuse large B cell lymphoma, non-germinal center type	DLBCL	3	1	3	3	3	2	1	3	0	<1%	1	1	1	1	1	1	0	1	3	1	1	1	1	1	1	1	3	1	1	1	1	1	1	1	1	1	1	1	1	1	1	1	1
2	E0105 B	Diffuse Large B cell Lymphoma	medium B, ML, LBL, DL	FULL	Diffuse large B cell lymphoma, non-germinal center type	DLBCL	3	1	3	3	3	2	1	3	0	<1%	1	1	1	1	1	1	0	1	3	1	1	1	1	1	1	1	3	1	1	1	1	1	1	1	1	1	1	1	1	1	1	1	1
2	E0106 B	High grade Diffuse Large B cell Lymphoma	DL, ALCL	FULL	Diffuse large B cell lymphoma, germinal center type	DLBCL	3	1	3	3	3	2	1	3	0	<1%	1	1	1	1	1	1	0	1	3	1	1	1	1	1	1	1	3	1	1	1	1	1	1	1	1	1	1	1	1	1	1	1	1
2	E0107 B	Diffuse large cell lymphoma type lymphoproliferative process	HGBL, Burkitt	PARTIAL	Burkitt lymphoma	Agg BCL	3	1	3	3	3	2	1	3	0	<1%	1	1	1	1	1	1	0	1	3	1	1	1	1	1	1	1	3	1	1	1	1	1	1	1	1	1	1	1	1	1	1	1	1
2	E0108 B	Mantle B cell lymphoma	small B	FULL	Mantle cell lymphoma	MCL	3	1	3	3	3	2	1	3	0	<1%	1	1	1	1	1	1	0	1	3	1	1	1	1	1	1	1	3	1	1	1	1	1	1	1	1	1	1	1	1	1	1	1	1
2	E0109 B	High grade Diffuse Large B Cell Lymphoma	DL	FULL	Diffuse large B cell lymphoma, non-germinal center type	DLBCL	3	1	3	3	3	2	1	3	0	<1%	1	1	1	1	1	1	0	1	3	1	1	1	1	1	1	1	3	1	1	1	1	1	1	1	1	1	1	1	1	1	1	1	1
2	E0110 B	lymphoproliferative process suggestive of Diffuse large cell lymphoma	PTCL, AITL	NONE	Mantle cell lymphoma	MCL	3	1	3	3	3	2	1	3	0	<1%	1	1	1	1	1	1	0	1	3	1	1	1	1	1	1	1	3	1	1	1	1	1	1	1	1	1	1	1	1	1	1	1	1
2	E0111 C	Diffuse large B- cell lymphoma (Relapse)	DL	FULL	Diffuse large B cell lymphoma, germinal center type	DLBCL	3	1	3	3	3	2	1	3	0	<1%	1	1	1	1	1	1	0	1	3	1	1	1	1	1	1	1	3	1	1	1	1	1	1	1	1	1	1	1	1	1	1	1	1
2	E0112 B	Large T cell Anaplastic lymphoma	cHL, PTCL	NONE	Classic Hodgkin Lymphoma	HL	3	1	3	3	3	2	1	3	0	<1%	1	1	1	1	1	1	0	1	3	1	1	1	1	1	1	1	3	1	1	1	1	1	1	1	1	1	1	1	1	1	1	1	1
2	E0113 B	lymphoproliferative process consistent with High grade lymphoma	reactive granulomatous reaction, cHL	PARTIAL	NK/T cell lymphoma	NKTCL	3	1	3	3	3	2	1	3	0	<1%	1	1	1	1	1	1	0	1	3	1	1	1	1	1	1	1	3	1	1	1	1	1	1	1	1	1	1	1	1	1	1	1	1
2	E0114 B	Nasal NK/T-cell lymphoma	cHL, PTCL	NONE	Classic Hodgkin Lymphoma	HL	3	1	3	3	3	2	1	3	0	<1%	1	1	1	1	1	1	0	1	3	1	1	1	1	1	1	1	3	1	1	1	1	1	1	1	1	1	1	1	1	1	1	1	1
2	E0115 B	Diffuse Large B Cell Lymphoma (relapse)	DL	FULL	Diffuse large B cell lymphoma, germinal center type	DLBCL	3	1	3	3	3	2	1	3	0	<1%	1	1	1	1	1	1	0	1	3	1	1	1	1	1	1	1	3	1	1	1	1	1	1	1	1	1	1	1	1	1	1	1	1
2	E0117 B	lymphoproliferative process consistent with lymphoma	small B	PARTIAL	NK/T cell lymphoma	NKTCL	3	1	3	3	3	2	1	3	0	<1%	1	1	1	1	1	1	0	1	3	1	1	1	1	1	1	1	3	1	1	1	1	1	1	1	1	1	1	1	1	1	1	1	1
2	E0119 B	Small cell lymphoma type lymphoproliferative process	small/large B?	PARTIAL	Follicular lymphoma, grade 3	FL	3	1	3	3	3	2	1	3	0	<1%	1	1	1	1	1	1	0	1	3	1	1	1	1	1	1	1	3	1	1	1	1	1	1	1	1	1	1	1	1	1	1	1	1
2	E0120 B	mixed cellularity Hodgkin disease	cHL	FULL	Classic Hodgkin Lymphoma	HL	3	1	3	3	3	2	1	3	0	<1%	1	1	1	1	1	1	0	1	3	1	1	1	1	1	1	1	3	1	1	1	1	1	1	1	1	1	1	1	1	1	1	1	1
2	E0121 B	High grade Diffuse lymphoma type lymphoproliferative process	DL	FULL	Diffuse large B cell lymphoma, non-germinal center type	DLBCL	3	1	3	3	3	2	1	3	0	<1%	1	1	1	1	1	1	0	1	3	1	1	1	1	1	1	1	3	1	1	1	1	1	1	1	1	1	1	1	1	1	1	1	1
2	E0122 B	Diffuse Large B cell Lymphoma	DL	FULL	Diffuse large B cell lymphoma, non-germinal center type	DLBCL	3	1	3	3	3	2	1	3	0	<1%	1	1	1	1	1	1	0	1	3	1	1	1	1	1	1	1	3	1	1	1	1	1	1	1	1	1	1	1	1	1	1	1	1
2	E0123 B	not classifiable lymphoma by extensively necrosis	PEL, DL	PARTIAL	NK/T cell lymphoma	NKTCL	3	1	3	3	3	2	1	3	0	<1%	1	1	1	1	1	1	0	1	3	1	1	1	1	1	1	1	3	1	1	1	1	1	1	1	1	1	1	1	1	1	1	1	1
2	E0126 B	Follicular lymphoma type lymphoproliferative process (pathology diagnosis)	CLL/SLL, small B	FULL	Follicular lymphoma, grade 1-2	FL	3	1	3	3	3	2	1	3	0	<1%	1	1	1	1	1	1	0	1	3	1	1	1	1	1	1	1	3	1	1	1	1	1	1	1	1	1	1	1	1	1	1	1	1
2	E0127 B	B cell lymphoma suggestive of Follicular lymphoma	DL transformed from MZL	NONE	Diffuse large B cell lymphoma, non-germinal center type	DLBCL	3	1	3	3	3	2	1	3	0	<1%	1	1	1	1	1	1	0	1	3	1	1	1	1	1	1	1	3	1	1	1	1	1	1	1	1	1	1	1	1	1	1	1	1
2	E0128 B	Follicular lymphoma	FL grade 1-2	FULL	Follicular lymphoma, grade 1-2	FL	3	1	3	3	3	2	1	3	0	<1%	1	1	1	1	1	1	0	1	3	1	1	1	1	1	1	1	3	1	1	1	1	1	1	1	1	1	1	1	1	1	1	1	1
2	E0129 B	Follicular Lymphoma grade 2	DL	NONE	B lymphoblastic lymphoma	Agg BCL	3	1	3	3	3	2	1	3	0	<1%	1	1	1	1	1	1	0	1	3	1	1	1	1	1	1	1	3	1	1	1	1	1	1	1	1	1	1	1	1	1	1	1	1
2	E0131 B	Mantle lymphoma	MZL, PTCL	FULL	Mantle cell lymphoma	MCL	3	1	3	3	3	2	1	3	0	<1%	1	1	1	1	1	1	0	1	3	1	1	1	1	1	1	1	3	1	1	1	1	1	1	1	1	1	1	1	1	1	1	1	1
2	E0132 B	High grade lymphoma	DL, HGBL	FULL	Diffuse large B cell lymphoma, non-germinal center type	DLBCL	3	1	3	3	3	2	1	3	0	<1%	1	1	1	1	1	1	0	1	3	1	1	1	1	1	1	1	3	1	1	1	1	1	1	1	1	1	1	1	1	1	1	1	1
2	E0133 B	Classical Hodgkin's lymphoma, nodular sclerosis variant	cHL, NLPHL	FULL	Classic Hodgkin Lymphoma	HL	3	1	3	3	3	2	1	3	0	<1%	1	1	1	1	1	1	0	1	3	1	1	1	1	1	1	1	3	1	1	1	1	1	1	1	1	1	1	1	1	1	1	1	1
2	E0136 B	Diffuse Large B cell Lymphoma	DL	FULL	Diffuse large B cell lymphoma, non-germinal center type	DLBCL	3	1	3	3	3	2	1	3	0	<1%	1	1	1	1	1	1	0	1	3	1	1	1	1	1	1	1	3	1	1	1	1	1	1	1	1	1	1	1	1	1	1	1	1
2	E0137 B	Extranodal NK/T-cell lymphoma, nasal type	NK/T	FULL	NK/T cell lymphoma	NKTCL	3	1	3	3	3	2	1	3	0	<1%	1	1	1	1	1	1	0	1	3	1	1	1	1	1	1	1	3	1	1	1	1	1	1	1	1	1	1	1	1	1	1	1	1
2	E0138 B	Diffuse Large B cell Lymphoma	DL, leg type? (skin)	FULL	Diffuse large B cell lymphoma, germinal center type	DLBCL	3	1	3	3	3	2	1	3	0	<1%	1	1	1	1	1	1	0	1	3	1	1	1	1	1	1	1	3	1	1	1	1	1	1	1	1	1	1	1	1	1	1	1	1
2	E0140 B	Classical Hodgkin's lymphoma, nodular sclerosis variant	cHL	FULL	Classic Hodgkin Lymphoma	HL	3	1	3	3	3	2	1	3	0	<1%	1	1	1	1	1	1	0	1	3	1	1	1	1	1	1	1	3	1	1	1	1	1	1	1	1	1	1	1	1	1	1	1	1
2	E0141 B	lymphoproliferative process suggestive of lymphoma with marked eosinophilia	cHL	PARTIAL	Classic Hodgkin Lymphoma	HL	3	1	3	3	3	2	1	3	0	<1%	1	1	1	1	1	1	0	1	3	1	1	1	1	1	1	1	3	1	1	1	1	1	1	1	1	1	1	1	1	1	1	1	1
2	E0143 B	lymphoproliferative process suggestive of Hodgkin´s lymphoma	cHL	FULL	Classic Hodgkin Lymphoma	HL	3	1	3	3	3	2	1	3	0	<1%	1	1	1	1	1	1	0	1	3	1	1	1	1	1	1	1	3	1	1	1	1	1	1	1	1	1	1	1	1	1	1	1	1
2	E0144 B	High grade Diffuse Large Cell Lymphoma	intermedaite B, HGBL	PARTIAL	Peripheral T cell lymphoma, NOS	TCL	3	1	3	3	3	2	1	3	0	<1%	1	1	1	1	1	1	0	1	3	1	1	1	1	1	1	1	3	1	1	1	1	1	1	1	1	1	1	1	1	1	1	1	1
2	E0145 B	Anaplastic Lymphoma	cHL	NONE	Classic Hodgkin Lymphoma	HL	3	1	3	3	3	2	1	3	0	<1%	1	1	1	1	1	1	0	1	3	1	1	1	1	1	1	1	3	1	1	1	1	1	1	1	1	1	1	1	1	1	1	1	1
2	E0148 B	lymphoproliferative process suggestive of lymphoma	HGBL, DL	NONE	Diffuse large B cell lymphoma, non-germinal center type	DLBCL	3	1	3	3	3	2	1	3	0	<1%	1	1	1	1	1	1	0	1	3	1	1	1	1	1	1	1	3	1	1	1	1	1	1	1	1	1	1	1	1	1	1	1	1
2	E0151 B	Rich lymphocytes Classic Hodgkin lymphoma	cHL	FULL	Classic Hodgkin Lymphoma	HL	3	1	3	3	3	2	1	3	0	<1%	1	1	1	1	1	1	0	1	3	1	1	1	1	1	1	1	3	1	1	1	1	1	1	1	1	1	1	1	1	1	1	1	1
2	E0153 B	lymphoproliferative process suggestive of Small cell lymphoma	FL 1-2	FULL	Marginal zone lymphoma	MZL	3	1	3	3	3	2	1	3	0	<1%	1	1	1	1	1	1	0	1	3	1	1	1	1	1	1	1	3	1	1	1	1	1	1	1	1	1	1	1	1	1	1	1	1
2	E0154 B	BCLU with intermediate characteristics between DLBCL and Burkitt lymphoma	DL, HGBL, LBL	PARTIAL	Diffuse large B cell lymphoma, germinal center type	DLBCL	3	1	3	3	3	2	1	3	0	<1%	1	1	1	1	1	1	0	1	3	1	1	1	1	1	1	1	3	1	1	1	1	1	1	1	1	1	1	1	1	1	1	1	1
2	E0155 C	carcinoma vs lymphoma	cHL, DL	NONE	Diffuse large B cell lymphoma, non-germinal center type	DLBCL	3	1	3	3	3	2	1	3	0	<1%	1	1	1	1	1	1	0	1	3	1	1	1	1	1	1	1	3	1	1	1	1	1	1	1	1	1	1	1	1	1	1	1	1
2	E0156 B	Diffuse Large B Cell Lymphoma	DL	FULL	Diffuse large B cell lymphoma, germinal center type	DLBCL	3	1	3	3	3	2	1	3	0	<1%	1	1	1	1	1	1	0	1	3	1	1	1	1	1	1	1	3	1	1	1	1	1	1	1	1	1	1	1	1	1	1	1	1
2	E0157 B	Mantle lymphoma	large T/B lymphoma, syncial cHL	FULL	Mantle cell lymphoma	MCL	3	1	3	3	3	2	1	3	0	<1%	1	1	1	1	1	1	0	1	3	1	1	1	1	1	1	1	3	1	1	1	1	1	1	1	1	1	1	1	1	1	1	1	1
2	E0160 B	Follicular Lymphoma grade 1	FL 3A	PARTIAL	Follicular lymphoma, grade 3	FL	3	1	3	3	3	2	1	3	0	<1%	1	1	1	1	1	1	0	1	3	1	1	1	1	1	1	1	3	1	1	1	1	1	1	1	1	1	1	1	1	1	1	1	1
2	E0161 C	Diffuse large and small cell Lymphoma	MZL, plasmacytoid neoplasm	PARTIAL	Marginal zone lymphoma	MZL	3	1	3	3	3	2	1	3	0	<1%	1	1	1	1	1	1	0	1	3	1	1	1	1	1	1	1	3	1	1	1	1	1	1	1	1	1	1	1	1	1	1	1	1
2	E0163 B	Diffuse Large B Cell Lymphoma	DL	FULL	Diffuse large B cell lymphoma, germinal center type	DLBCL	3	1	3	3	3	2	1	3	0	<1%	1	1	1	1	1	1	0	1	3	1	1	1	1	1	1	1	3	1	1	1	1	1	1	1	1	1	1	1	1	1	1	1	1
2	E0164 B	Diffuse Large B Cell Lymphoma	DL	FULL	Diffuse large B cell lymphoma, non-germinal center type	DLBCL	3	1	3	3	3	2	1	3	0	<1%	1	1	1	1	1	1	0	1	3	1	1	1	1	1	1	1	3	1	1	1	1	1	1	1	1	1	1	1	1	1	1	1	1
2	E0166 B	Diffuse Large B Cell Lymphoma	DL	FULL	Diffuse large B cell lymphoma, non-germinal center type	DLBCL	3	1	3	3	3	2	1	3	0	<1%	1	1	1	1	1	1	0	1	3	1	1	1	1	1	1	1	3	1	1	1	1	1	1	1	1	1	1	1	1	1	1	1	1
2	E0167 B	Diffuse Large B Cell Lymphoma	HGBL	FULL	Diffuse large B cell lymphoma, non-germinal center type	DLBCL	3	1	3	3	3	2	1	3	0	<1%	1	1	1	1	1	1	0	1	3	1	1	1	1	1	1	1	3	1	1	1	1	1	1	1	1	1	1	1	1	1	1	1	1
2	E0170 B	Nodular lymphoma type lymphoproliferative process	DL	NONE	Diffuse large B cell lymphoma, non-germinal center type	DLBCL	3	1	3	3	3	2	1	3	0	<1%	1	1	1	1	1	1	0	1	3	1	1	1	1	1	1	1	3	1	1	1	1	1	1	1	1	1	1	1	1	1	1	1	1
2	E0171 B	Diffuse Large B Cell Lymphoma	HGBL	PARTIAL	Diffuse large B cell lymphoma, non-germinal center type	DLBCL	3	1	3	3	3	2	1	3	0	<1%	1	1	1	1	1	1	0	1	3	1	1	1	1	1	1	1	3	1	1	1	1	1	1	1	1	1	1	1	1	1	1	1	1
2	E0172 B	Diffuse Large cell lymphoma type lymphoproliferative process	Plasmablastic lymphoma, plasma cell neoplasm, DL	PARTIAL	Diffuse large B cell lymphoma, germinal center type	DLBCL	3	1	3	3	3	2	1	3	0	<1%	1	1	1	1	1	1	0	1	3	1	1	1	1	1	1	1	3	1	1	1	1	1	1	1	1	1	1	1	1	1	1	1	1
2	E0173 B	Diffuse Large cell lymphoma type lymphoproliferative process	medium sized B, DL	NONE	Mantle cell lymphoma	MCL	3	1	3	3	3	2	1	3	0	<1%	1	1	1	1	1	1	0	1	3	1	1	1	1	1	1	1	3	1	1	1	1	1	1	1	1	1	1	1	1	1	1	1	1
2	E0174 C	Diffuse Large B Cell Lymphoma	HGBL, Burkitt, LBL	PARTIAL	Burkitt lymphoma	Agg BCL	3	1	3	3	3	2	1	3	0	<1%	1	1	1	1	1	1	0	1	3	1	1	1	1	1	1	1	3	1	1	1	1	1	1	1	1	1	1	1	1	1	1	1	1
2	E0175 B	Diffuse large and small cell Lymphoma type lymphoproliferative process	HGBL, Burkitt, mantle	NONE	Mantle cell lymphoma	MCL	3	1	3	3	3	2	1	3	0	<1%	1	1	1	1	1	1	0	1	3	1	1	1	1	1	1	1	3	1	1	1	1	1	1	1	1	1	1	1	1	1	1	1	1
2	E0176 A	Diffuse Large B Cell Lymphoma	DL	FULL	Diffuse large B cell lymphoma, non-germinal center type	DLBCL	3	1	3	3	3	2	1	3	0	<1%	1	1	1	1	1	1	0	1	3	1	1	1	1	1	1	1	3	1	1	1	1	1	1	1	1	1	1	1	1	1	1	1	1
2	E0177 B	lymphoproliferative process suggestive of lymphoma	cHL	NONE	Classic Hodgkin Lymphoma	HL	3	1	3	3	3	2	1	3	0	<1%	1	1	1	1	1	1	0	1	3	1	1	1	1	1	1	1	3	1	1	1	1	1	1	1	1	1	1	1	1	1	1	1	1
2	E0178 B	Diffuse small cell lymphoma type lymphoproliferative process	DL, HGBL	NONE	Diffuse large B cell lymphoma, non-germinal center type	DLBCL	3	1	3	3	3	2	1	3	0	<1%	1	1	1	1	1	1	0	1	3	1	1	1	1	1	1	1	3	1	1	1	1	1	1	1	1	1	1	1	1	1	1	1	1
2	E0181 B	Chronic Lymphocytic Leukemia / Small Cell Lymphocytic Lymphoma	CLL, MZL	PARTIAL	Marginal zone lymphoma	MZL	3	1	3	3	3	2	1	3	0	<1%	1	1	1	1	1	1	0	1	3	1	1	1	1	1	1	1	3	1	1	1	1	1	1	1	1	1	1	1	1	1	1	1	1
2	E0182 B	Mantle Small cell Lymphoma	ML, small B	FULL	Mantle cell lymphoma	MCL	3	1	3	3	3	2	1	3	0	<1%	1	1	1	1	1	1	0	1	3	1	1	1	1	1	1	1	3	1	1	1	1	1	1	1	1	1	1	1	1	1	1	1	1
2	E0183 B	non-germinal center diffuse large B cell lymphoma	DL	FULL	Diffuse large B cell lymphoma, non-germinal center type	DLBCL	3	1	3	3	3	2	1	3	0	<1%	1	1	1	1	1	1	0	1	3	1	1	1	1	1	1	1	3	1	1	1	1	1	1	1	1	1	1	1	1	1	1	1	1
2	E0185 A	undifferentiated Malignant neoplasm	DL	NONE	Diffuse large B cell lymphoma, germinal center type	DLBCL	3	1	3	3	3	2	1	3	0	<1%	1	1	1	1	1	1	0	1	3	1	1	1	1	1	1	1	3	1	1	1	1	1	1	1	1	1	1	1	1	1	1	1	1
2	E0186 B	Diffuse small Cell Lymphoma type lymphoproliferative process	small B	PARTIAL	Mantle cell lymphoma	MCL	3	1	3	3	3	2	1	3	0	<1%	1	1	1	1	1	1	0	1	3	1	1	1	1	1	1	1	3	1	1	1	1	1	1	1	1	1	1	1	1	1	1	1	1
2	E0190 C	Diffuse small cell Lymphoma /Follicular lymphoma vrs Mantle lymphoma (Relapse of 2013)	Mantle	PARTIAL	Mantle cell lymphoma	MCL	3	1	3	3	3	2	1	3	0	<1%	1	1	1	1	1	1	0	1	3	1	1	1	1	1	1	1	3	1	1	1	1	1	1	1	1	1	1	1	1	1	1	1	1
2	E0191 C	Follicular Lymphoma grade 2	FL 1-2	FULL	Follicular lymphoma, grade 1-2	FL	3	1	3	3	3	2	1	3	0	<1%	1	1	1	1	1	1	0	1	3	1	1	1	1	1	1	1	3	1	1	1	1	1	1	1	1	1	1	1	1	1	1	1	1
2	E0192 B	Mixed cellularity Hodgkin disease	cHL	FULL	Classic Hodgkin Lymphoma	HL	3	1	3	3	3	2	1	3	0	<1%	1	1	1	1	1	1	0	1	3	1	1	1	1	1	1	1	3	1	1	1	1	1	1	1	1	1	1	1	1	1	1	1	1
2	E0197 B	germinal center large B cell lymphoma	medium/large B, DL	FULL	Diffuse large B cell lymphoma, germinal center type	DLBCL	3	1	3	3	3	2	1	3	0	<1%	1	1	1	1	1	1	0	1	3	1	1	1	1	1	1	1	3	1	1	1	1	1	1	1	1	1	1	1	1	1	1	1	1
2	E0198 C	germinal center diffuse large B cell lymphoma	DL	PARTIAL	High grade B cell lymphoma with MYC and BCL2 or BCL6 rearrangements	DLBCL	3	1	3	3	3	2	1	3	0	<1%	1	1	1	1	1	1	0	1	3	1	1	1	1	1	1	1	3	1	1	1	1	1	1	1	1	1	1	1	1	1	1	1	1
2	E0199 B	Diffuse large B cell Lymphoma type lymphoproliferative process	DL	FULL	Diffuse large B cell lymphoma, non-germinal center type	DLBCL	3	1	3	3	3	2	1	3	0	<1%	1	1	1	1	1	1	0	1	3	1	1	1	1	1	1	1	3	1	1	1	1	1	1	1	1	1	1	1	1	1	1	1	1
2	E0200 B	mixed cellularity Hodgkin disease	cHL	FULL	Classic Hodgkin Lymphoma	HL	3	1	3	3	3	2	1	3	0	<1%	1	1	1	1	1	1	0	1	3	1	1	1	1	1	1	1	3	1	1	1	1	1	1	1	1	1	1	1	1	1	1	1	1
2	E0201 B	lymphoproliferative process suggestive of Diffuse lymphoma	DL	FULL	Diffuse large B cell lymphoma, germinal center type	DLBCL	3	1	3	3	3	2	1	3	0	<1%	1	1	1	1	1	1	0	1	3	1	1	1	1	1	1	1	3	1	1	1	1	1	1	1	1	1	1	1	1	1	1	1	1
2	E0202 B	non-germinal center diffuse large B cell lymphoma	ATLL, DL	FULL	Diffuse large B cell lymphoma, non-germinal center type	DLBCL	3	1	3	3	3	2	1	3	0	<1%	1	1	1	1	1	1	0	1	3	1	1	1	1	1	1	1	3	1	1	1	1	1	1	1	1	1	1	1	1	1	1	1	1
2	E0204 B	Nodular sclerosis Hodgkin disease	cHL	FULL	Classic Hodgkin Lymphoma	HL	3	1	3	3	3	2	1	3	0	<1%	1	1	1	1	1	1	0	1	3	1	1	1	1	1	1	1	3	1	1	1	1	1	1	1	1	1	1	1	1	1	1	1	1
2	E0205 B	extranodal NK/T-cell lymphoma, nasal type	NK/T, HGBL, PTCL	FULL	NK/T cell lymphoma	NKTCL	3	1	3	3	3	2	1	3	0	<1%	1	1	1	1	1	1	0	1	3	1	1	1	1	1	1	1	3	1	1	1	1	1	1	1	1	1	1	1	1	1	1	1	1
2	E0206 B	Anaplastic Lymphoma	large and anaplastic T/B	NONE	Diffuse large B cell lymphoma, non-germinal center type	DLBCL	3	1	3	3	3	2	1	3	0	<1%	1	1	1	1	1	1	0	1	3	1	1	1	1	1	1	1	3	1	1	1	1	1	1	1	1	1	1	1	1	1	1	1	1
2	E0208 B	Nodular sclerosis Hodgkin disease	cHL	FULL	Classic Hodgkin Lymphoma	HL	3	1	3	3	3	2	1	3	0	<1%	1	1	1	1	1	1	0	1	3	1	1	1	1	1	1	1	3	1	1	1	1	1	1	1	1	1	1	1	1	1	1	1	1
2	E0209 B	Diffuse large cell lymphoma type lymphoproliferative process	DL	FULL	Diffuse large B cell lymphoma, germinal center type	DLBCL	3	1	3	3	3	2	1	3	0	<1%	1	1	1	1	1	1	0	1	3	1	1	1	1	1	1	1	3	1	1	1	1	1	1	1	1	1	1	1	1	1	1	1	1
2	E0210 C	mixed cellularity hodgkin lymphoma (relapse of 2007)	cHL	FULL	Classic Hodgkin Lymphoma	HL	3	1	3	3	3	2	1	3	0	<1%	1	1	1	1	1	1	0	1	3	1	1	1	1	1	1	1	3	1	1	1	1	1	1	1	1	1	1	1	1	1	1	1	1
2	E0211 B	mixed cellularity hodgkin lymphoma	cHL	FULL	Classic Hodgkin Lymphoma	HL	3	1	3	3	3	2	1	3	0	<1%	1	1	1	1	1	1	0	1	3	1	1	1	1	1	1	1	3	1	1	1	1	1	1	1	1	1	1	1	1	1	1	1	1
2	E0213 B	non-germinal center diffuse large B cell lymphoma	large B/T (?EBV)	PARTIAL	Diffuse large B cell lymphoma, germinal center type	DLBCL	3	1	3	3	3	2	1	3	0	<1%	1	1	1	1	1	1	0	1	3	1	1	1	1	1	1	1	3	1	1	1	1	1	1	1	1	1	1	1	1	1	1	1	1
2	E0214 B	Small cell Mantle lymphoma	ML, CLL/SLL, small B	FULL	Mantle cell lymphoma	MCL	3	1	3	3	3	2	1	3	0	<1%	1	1	1	1	1	1	0	1	3	1	1	1	1	1	1	1	3	1	1	1	1	1	1	1	1	1	1	1	1	1	1	1	1
2	E0216 C	non-germinal center diffuse large B cell lymphoma	HGBL	PARTIAL	Diffuse large B cell lymphoma, non-germinal center type	DLBCL	3	1	3	3	3	2	1	3	0	<1%	1	1	1	1	1	1	0	1	3	1	1	1	1	1	1	1	3	1	1	1	1	1	1	1	1	1	1	1	1	1	1	1	1
2	E0217 C	Small cell Follicular lymphoma grade 1 (Second Relapse from 2011)	HGBL, cHL, germinotrophic (HIV); re-review = FL3	NONE	Follicular lymphoma, grade 3	FL	3	1	3	3	3	2	1	3	0	<1%	1	1	1	1	1	1	0	1	3	1	1	1	1	1	1	1	3	1	1	1	1	1	1	1	1	1	1	1	1	1	1	1	1
2	E0218 B	Classical Hodgkin's lymphoma, nodular sclerosis variant	cHL	FULL	Classic Hodgkin Lymphoma	HL	3	1	3	3	3	2	1	3	0	<1%	1	1	1	1	1	1	0	1	3	1	1	1	1	1	1	1	3	1	1	1	1	1	1	1	1	1	1	1	1	1	1	1	1
2	E0219 B	Diffuse large b cell lymphoma	cHL	FULL	Diffuse large B cell lymphoma, NOS	DLBCL	3	1	3	3	3	2	1	3	0	<1%	1	1	1	1	1	1	0	1	3	1	1	1	1	1	1	1	3	1	1	1	1	1	1	1	1	1	1	1	1	1	1	1	1
2	E0221 B	mixed cellularity hodgkin lymphoma	NLPHL, LP-cHL	FULL	Classic Hodgkin Lymphoma	HL	3	1	3	3	3	2	1	3	0	<1%	1	1	1	1	1	1	0	1	3	1	1	1	1	1	1	1	3	1	1	1	1	1	1	1	1	1	1	1	1	1	1	1	1
2	E0222 B	Diffuse small and intermediate cell lymphoproliferative process consistent with lymphoma	ML, CLL/SLL, small B	NONE	Mantle cell lymphoma	MCL	3	1	3	3	3	2	1	3	0	<1%	1	1	1	1	1	1	0	1	3	1	1	1	1	1	1	1	3	1	1	1	1	1	1	1	1	1	1	1	1	1	1	1	1
2	E0223 B	extranodal NK/T-cell lymphoma, nasal type	NK/T	FULL	NK/T cell lymphoma	NKTCL	3	1	3	3	3	2	1	3	0	<1%	1	1	1	1	1	1	0	1	3	1	1	1	1	1	1	1	3	1	1	1	1	1	1	1	1	1	1	1	1	1	1	1	1
2	E0224 B	non-germinal center diffuse large B cell lymphoma	DL	FULL	Diffuse large B cell lymphoma, non-germinal center type	DLBCL	3	1	3	3	3	2	1	3	0	<1%	1	1	1	1	1	1	0	1	3	1	1	1	1	1	1	1	3	1	1	1	1	1	1	1	1	1	1	1	1	1	1	1	1
2	E0225 B	germinal center diffuse large cell lymphoma	HGBL, ?AML	FULL	Diffuse large B cell lymphoma, germinal center type	DLBCL	3	1	3	3	3	2	1	3	0	<1%	1	1	1	1	1	1	0	1	3	1	1	1	1	1	1	1	3	1	1	1	1	1	1	1	1	1	1	1	1	1	1	1	1
2	E0226 B	Classical Hodgkin lymphoma	cHL	FULL	Classic Hodgkin Lymphoma	HL	3	1	3	3	3	2	1	3	0	<1%	1	1	1	1	1	1	0	1	3	1	1	1	1	1	1	1	3	1	1	1	1	1	1	1	1	1	1	1	1	1	1	1	1
2	E0227 B	Classic Mantle lymphoma	small B	FULL	Mantle cell lymphoma	MCL	3	1	3	3	3	2	1	3	0	<1%	1	1	1	1	1	1	0	1	3	1	1	1	1	1	1	1	3	1	1	1	1	1	1	1	1	1	1	1	1	1	1	1	1
2	E0228 B	T cell Lymphoblastic Leukemia	?smal B (bone marrow)	PARTIAL	B lymphoblastic lymphoma	Agg BCL	3	1	3	3	3	2	1	3	0	<1%	1	1	1	1	1	1	0	1	3	1	1	1	1	1	1	1	3	1	1	1	1	1	1	1	1	1	1	1	1	1	1	1	1
2	E0229 B	Peripheral T-Cell Lymphoma	ALCL	PARTIAL	Anaplastic large cell lymphoma, ALK negative	TCL	3	1	3	3	3	2	1	3	0	<1%	1	1	1	1	1	1	0	1	3	1	1	1	1	1	1	1	3	1	1	1	1	1	1	1	1	1	1	1	1	1	1	1	1
2	E0230 B	non-germinal center diffuse large B cell lymphoma	small B, cHL	NONE	Marginal zone lymphoma	MZL	3	1	3	3	3	2	1	3	0	<1%	1	1	1	1	1	1	0	1	3	1	1	1	1	1	1	1	3	1	1	1	1	1	1	1	1	1	1	1	1	1	1	1	1
2	E0231 B	Classical Hodgkin's lymphoma, nodular sclerosis variant	cHL	FULL	Classic Hodgkin Lymphoma	HL	3	1	3	3	3	2	1	3	0	<1%	1	1	1	1	1	1	0	1	3	1	1	1	1	1	1	1	3	1	1	1	1	1	1	1	1	1	1	1	1	1	1	1	1
2	E0232 A	Small cell Undifferentiated malignant neoplasm with extensive necrosis	DL	NONE	Diffuse large B cell lymphoma, germinal center type	DLBCL	3	1	3	3	3	2	1	3	0	<1%	1	1	1	1	1	1	0	1	3	1	1	1	1	1	1	1	3	1	1	1	1	1	1	1	1	1	1	1	1	1	1	1	1
2	E0233 B	lymphoproliferative process consistent with High grade lymphoma	DL transformed from FL/MZL	FULL	Diffuse large B cell lymphoma, non-germinal center type	DLBCL	3	1	3	3	3	2	1	3	0	<1%	1	1	1	1	1	1	0	1	3	1	1	1	1	1	1	1	3	1	1	1	1	1	1	1	1	1	1	1	1	1	1	1	1
2	E0235 B	non-germinal center diffuse large cell lymphoma	DL, ALCL (?CKMIX, S100)	FULL	Diffuse large B cell lymphoma, non-germinal center type	DLBCL	3	1	3	3	3	2	1	3	0	<1%	1	1	1	1	1	1	0	1	3	1	1	1	1	1	1	1	3	1	1	1	1	1	1	1	1	1	1	1	1	1	1	1	1
2	E0236 B	germinal center diffuse large cell lymphoma	FL 3B, DL	FULL	Diffuse large B cell lymphoma, germinal center type	DLBCL	3	1	3	3	3	2	1	3	0	<1%	1	1	1	1	1	1	0	1	3	1	1	1	1	1	1	1	3	1	1	1	1	1	1	1	1	1	1	1	1	1	1	1	1
2	E0237 B	Classic Mantle lymphoma	intermedaite B, HGBL	FULL	Mantle cell lymphoma	MCL	3	1	3	3	3	2	1	3	0	<1%	1	1	1	1	1	1	0	1	3	1	1	1	1	1	1	1	3	1	1	1	1	1	1	1	1	1	1	1	1	1	1	1	1
2	E0239 B	Non-Hodgkin lymphoma-B	ALCL, DL	NONE	Diffuse large B cell lymphoma, germinal center type	DLBCL	3	1	3	3	3	2	1	3	0	<1%	1	1	1	1	1	1	0	1	3	1	1	1	1	1	1	1	3	1	1	1	1	1	1	1	1	1	1	1	1	1	1	1	1
3	E0023 B	Follicular Lymphoma	FL 1-2	FULL	Follicular lymphoma, grade 1-2	FL	3	1	3	3	3	3	1	3	2	<1%	1	1	1	1	1	1	1	1	3	3	1	1	1	1	1	1	3	1	1	1	1	1	1	1	1	1	1	1	1	1		1	1
3	E0037 B	Lymphoid Hyperplasia, suspected Lymphoma	MZL, FL	PARTIAL	Marginal zone lymphoma	MZL	3	1	3	3	1	1	1	3	2	<1%	1	1	1	1	3	1	1	1	1	1	1	1	1	1	1	1	2	1	1	1	1	1	1	1	1	1	1	1	1	1		1	1
3	E0039 B	Hodgkin Disease	cHL, PTCL (plasmacytoid - MZL?)	PARTIAL	Classic Hodgkin Lymphoma (initial Stanford diagnosis was PTCL, NOS)	HL	2	0	1	3 (variable)	1	1	2	3	2	<1%	1	1	1	1	1	1	1	3 (dim)	1	1	1	0	1	2	2	1	2 (dim)	0	1	1	1	1	1	1	1	1	1	1	1	1		1	1
3	E0057 B	Diffuse Large Cell Non-Hodgkin Lymphoma	DL, LBL	FULL	Diffuse large B cell lymphoma, germinal center type	DLBCL	3	1	3	3	1	3	1	3	2	0.05	1	1	1	1	1	1	1	1	1	2	1	1	1	1	1	1	3	1	1	1	1	1	1	1	1	1	1	1	1	1		1	1
3	E0167 B	Diffuse Large B-Cell Lymphoma	MZL, ?DL	NONE	Diffuse large B cell lymphoma, non-germinal center type	DLBCL	3	1	3	3	1	1	2	3	1	<1%	1	1	1	1	1	1	1	1	1	1	1	1	2	1	1	1	3	1	1	1	1	1	1	1	1	1	1	1	0	1		1	1
3	E0190 B	Diffuse Small and intermediate Cell Lymphoma/Follicular Lymphoma vs Mantle Lymphoma	blastic ML, DL	PARTIAL	Mantle cell lymphoma	MCL	3	1	3	3	1	1	1	3	2	<1%	1	1	1	1	3	3	3	1	1	1	1	3	1	1	1	1	3	1	1	1	1	1	3	1	1	1	1	1	1	1		1	1
3	E0217 B	Small Cell Lymphoma with Follicular pattern, grade I	FL 3A	PARTIAL	Follicular lymphoma, grade 3	FL	0	1	3	3	2	1	1	3	1	<1%	1	1	1	1	1	1	1	1	1	1	1	1	1	1	1	1	2	1	1	1	1	1	1	1	1	1	1	1	1	1		1	3
3	E0240 C	Diffuse Large B Cell Lymphoma	HGBL, DLBCL	FULL	Diffuse large B cell lymphoma, non-germinal center type	DLBCL	3	1	3	3	1	2	3	3	3	0.5	1	1	1	1	3	1	1	3	3	1	1	1	1	1	1	1	3	1	1	1	1	1	1	1	1	1	1	1	1	1		1	1
3	E0243 B	Large B-Cell Lymphoma	DLBCL	FULL	Diffuse large B cell lymphoma, non-germinal center type	DLBCL	3	1	3	3	1	3	3	2	3	0.9	1	1	1	1	1	1	1	1	3	3	1	1	1	1	1	1	3	1	1	1	1	1	3	1	1	1	1	1	1	1		2	1
3	E0244 B	Large B-Cell Lymphoma	pleomorphic large T/B?, DL	FULL	Diffuse large B cell lymphoma, non-germinal center type	DLBCL	0	1	3	3	1	3	3	1	2	0.05	1	1	1	1	1	1	1	1	3	0	1	3	1	1	1	1	3	1	1	0	1	0	1	1	1	1	1	1	1	1		1	1
3	E0246 B	Intermediate between Burkitt and Diffuse Large B-Cell Lymphoma	DL	FULL	High grade B cell lymphoma with MYC and BCL2 or BCL6 rearrangements	DLBCL	3	1	3	3	3	3	1	3	3	0.9	1	1	1	1	1	1	1	3	3	3	1	3 (dim)	1	1	1	1	3		1	1	1	1	1	1	1	1	1	1	1	1		1	1
3	E0249 B	Mixed Cellularity Hodgkin Lymphoma	cHL	FULL	Classic Hodgkin Lymphoma	HL	1	1	1	3 (dim)	1	1	3	1	2	<1%	1	3	3	1	1	1	1	1	1	1	1	1	1	3	1	1	2	1	1	1	1	1	3	1	1	1	1	1	1	1		1	1
3	E0250 C	Diffuse Large B Cell Lymphoma	DL	FULL	Diffuse large B cell lymphoma, non-germinal center type	DLBCL	0	1	3	3	1	1	1	3	1	<1%	1	1	1	1	1	1	1	1	1	2	1	3 (dim)	1	1	1	1	3	1	1	1	1	1	1	1	1	1	1	1	1	1		1	1
3	E0251 B	extensively Necrotic Lymphoproliferative Process suggestive of Lymphoma	PTCL, HGBL	PARTIAL	Diffuse large B cell lymphoma, non-germinal center type	DLBCL	3	1	3	1	1	1	1	1	2	0.05	1	1	1	1	1	1	1	1	1	1	1	3	1	1	1	1	3	1	1	1	1	1	1	1	1	1	1	1	1	1		1	1
3	E0256 B	Nodular sclerosis classical hodgkin lymphoma	cHL	FULL	Classic Hodgkin Lymphoma	HL	1	1	1	3 (vari)	1	1	3	1	3	1	1	3	3	1	1	1	1	3 (dim)	1	1	1	1	1	3	3	1	1	1	1	1	1	1	3	1	1	1	1	1	2	1		1	1
3	E0258 B	Large Cell Lymphoma	PTCL, cHL, DL	FULL	Diffuse large B cell lymphoma, non-germinal center type	DLBCL	3	1	3	3	1	1	1	3	1	<1%	1	1	1	1	1	1	1	1	1	1	1	1	1	1	1	1	3 (dim)	1	1	1	1	1	1	1	1	1	1	1	1	1		1	1
3	E0260 B	Diffuse Small B- Cell Lymphoma	NK/T, HGBL	NONE	Diffuse large B cell lymphoma, non-germinal center type	DLBCL	0	1	3	1	1	1	1	1	0	N/A	1	1	1	1	1	1	1	1	1	1	1	3	1	1	1	1	1	0	1	1	1	1	1	1	1	1	1	1	1	1		1	1
3	E0261 B	Low grade Diffuse Small Cell Lymphoma	ML	PARTIAL	Mantle cell lymphoma	MCL	0	1	3	3	1	1	1	3	1	<1%	1	1	1	1	1	3	2	1	1	1	1	1	1	1	1	1	0	1	1	1	1	1	1	1	1	1	1	1	1	1		1	1
3	E0263 B	Grade I Follicular Lymphoma	MZL, small B	PARTIAL	Mantle cell lymphoma	MCL	3	1	3	3	1	1	1	3	1	<1%	1	1	1	1	3	3	2	1	1	1	1	1	1	1	1	1	2 (dim)	1	1	1	1	1	1	1	1	1	1	1	1	1		1	1
3	E0266 B	Diffuse Large B-Cell Lymphoma	DLBCL	FULL	Diffuse large B cell lymphoma, non-germinal center type	DLBCL	2	1	3	3	1	1	2	3	1	<1%	1	1	1	1	1	1	1	1	3	1	1	3 (dim)	1	1	1	1	3	1	1	1	1	1	1	1	1	1	1	1	1	1		1	1
3	E0267 B	Lymphoproliferative Process, consistent with Small Cell Lymphoma with plasmacytc diff	cHL	NONE	Classic Hodgkin Lymphoma	HL	0	1	1	1	1	1	2	1	3	<1%	1	3	1	1	1	1	1	1	1	1	1	1	1	3	2	1	1	1	1	1	1	1	3	1	1	1	1	3	3	3 (dim)		1	1
3	E0273 B	Suggestive of NK/T-cell Lymphoma, nasal type	PTCL, DLBCL	FULL	NK/T cell lymphoma	NKTCL	3 (dim)	3	1	1	1	1	1	3	3	1	1	3	1	1	1	1	1	1	1	1	1	3	1	1	1	1	1	3	1	3	1	1	1	1	1	3	3	3	2	1		1	1
3	E0275 B	Lymphoid Hyperplasia	HGBL, PTCL, DL	NONE	Diffuse large B cell lymphoma, non-germinal center type	DLBCL	0	1	3	3	1	1	1	2	2	0.05	1	3	1	1	1	1	1	1	1	2	1	1	3	1	1	1	3	0	1	1	1	1	2	1	1	1	1	1	1	1		1	1
3	E0283 B	Lymphoproliferative process consistent with High grade Lymphoma	DLBCL	FULL	Diffuse large B cell lymphoma, non-germinal center type	DLBCL	3	1	3	3	1	1	3	3	3	0.95	1	1	1	1	1	1	1	3	1	3	1	1	1	1	1	1	3	1	1	1	1	1	1	1	1	1	1	1	1	1		1	1
3	E0284 B	Reactive follicular hyperplasia	FL 1-2, RFH	FULL	Reactive Follicular Hyperplasia	Nonmalignant	0	1	3	3	2	1	1	1	1	<1%	1	1	1	1	1	1	1	1	0	1	1	1	1	1	1	1	3	1	1	1	1	1	1	1	1	1	1	1	1	1		1	1
3	E0287 B	Endocrine Carcinoma/Lymphoma	DLBCL	PARTIAL	Diffuse large B cell lymphoma, germinal center type	DLBCL	3	1	3	3	1	3	1	1	3	0.5	1	1	1	0	1	1	1	1	3	3	1	3	1	1	1	1	3	0	1	1	1	0	1	1	0	1	1	1	1	1		1	1
3	E0289 B	MALT	PTCL, ATLL, DL	NONE	Diffuse large B cell lymphoma, non-germinal center type	DLBCL	3	1	2	2	1	1	2	3	1	<1%	1	1	1	1	1	1	1	1	1	1	1	1	3	1	1	1	3	1	1	1	1	1	1	1	1	1	1	1	1	1		1	1
3	E0290 B	Lymphoproliferative process consistent with Non hodgkin Lymphoma	FL 3A	PARTIAL	Follicular lymphoma, grade 3A	FL	3	1	3	3	3	1	1	3	1	0.05	1	1	1	1	1	1	1	1	3	3	1	1	1	3	1	1	3	1	1	1	1	1	1	1	1	1	1	1	1	1		1	1
3	E0291 B	Mixed Cellularity Hodgkin Lymphoma	cHL	FULL	Classic Hodgkin Lymphoma	HL	1	1	1	3 (vari)	1	1	2	1	2 (dim)	<1%	1	3	1	1	2	1	1	2 (dim)	2 (dim)	1	1	0	1	3	3	1	1	1	1	1	1	1	3	1	1	1	1	1	1	1		1	1
3	E0293 B	Hodgkin Disease, Nodular sclerosis	cHL	FULL	Classic Hodgkin Lymphoma	HL	1	1	1	3 (dim)	1	1	3	0	3 (dim)	<1%	1	1	1	1	1	2	1	1	2 (dim)	1	1	0	1	3	3	1	1	2	1	1	1	1	3	1	1	1	1	1	1	1		1	3
3	E0295 B	High grade T Lymphoma	PTCL	FULL	Nodal peripheral T-cell lymphoma with T follicular helper phenotype	TCL	1	3	1	1	1	3	3	2	3	0.5	1	1	1	1	3	1	1	3	1	1	1	3	1	3	1	1	3 (dim)	3	1	1	3	1	3	2	1	1	1	1	1	1		1	1
3	E0297 B	Marginal Zone Lymphoma (MALT)	MZL	FULL	Marginal zone lymphoma	MZL	3	1	3	3	1	1	3	3	1	<1%	1	1	1	1	1	1	1	1	1	1	1	3	1	3	1	1	3	1	1	1	1	1	1	1	1	1	1	1	1	1		1	1
3	E0300 A	Mantle Cell Lymphoma	LBL, BL, mantle	FULL	Mantle cell lymphoma	MCL	3	1	3	3	1	1	1	3	3	0.2	1	1	1	1	3	3	3	1	1	3	1	2 (dim)	1	1	1	1	3	1	1	1	1	1	1	1	1	1	1	1	1	1		3	1
3	E0301 B	Lymphoproliferative process consistent with Non hodgkin lymphoma	BL, HGBL	NONE	Diffuse large B cell lymphoma, non-germinal center type	DLBCL	3	1	3	3	1	3	3	1	3	0.75	1	1	1	1	1	1	1	1	3	1	1	1	1	1	1	1	3	1	1	1	1	1	3	1	1	1	1	1	1	1		1	1
3	E0306 B	B Lymphoma	DLBCL	PARTIAL	Diffuse large B cell lymphoma, non-germinal center type	DLBCL	3	1	3	3	2	1	2	3	1	0.9	1	1	1	1	1	1	1	1	1	3	1	1	1	2	1	1	3(dim)	1	1	1	1	1	1	1	1	1	1	1	1	1		1	1
3	E0312 B	Hodgkin Lymphoma	cHL	FULL	Classic Hodgkin Lymphoma	HL	1	1	1	3 (vari)	1	1	3	1	3	0.5	1	3	1	1	1	1	1	3 (dim)	2 (dim)	1	1	1	1	3	2	1	1	1	1	1	1	1	0	1	1	1	1	1	1	1		1	1
3	E0318 B	Diffuse large cell lymphoma rich in eosinophils	cHL, PTCL, DL	FULL	Diffuse large B cell lymphoma, non-germinal center type	DLBCL	0	2	1	3	1	1	3	2	2	0.5	1	1	1	1	1	1	1	1	2	2	1	0	1	1	1	1	2	1	1	1	1	1	2	2	1	1	1	1	1	1		1	1
3	E0322 B	Testicular Lymphoma	HGBL, DL	PARTIAL	Diffuse large B cell lymphoma, non-germinal center type	DLBCL	3	1	3	3	1	1	3	1	2	0.5	1	1	1	1	1	1	1	1	3 (dim)	1	1	1	1	2	1	1	3	1	1	1	1	1	3	1	1	1	1	1	1	1		1	1
3	E0327 B	Large Cell Anaplastic Lymphoma	NK/T, PTCL, DL (ulcer)	NONE	Diffuse large B cell lymphoma, non-germinal center type	DLBCL	3	1	2	3	1	3	3	1	3	0.5	1	1	1	1	1	1	1	1	1	1	1	1	1	1	1	1	3	1	1	1	1	1	3	1	1	1	1	1	1	1		1	1
3	E0328 B	Follicular Lymphoma, grade II	FL 1-2	FULL	Follicular lymphoma, grade 1-2	FL	3	1	3	3	3	2	1	3	1	<1%	1	1	1	1	0	1	1	1	3	2 (dim)	1	1	1	1	1	1	3	1	1	1	1	1	1	1	1	1	1	1	1	1		1	3
3	E0329 B	Lymphoproliferative Process consistent with Lymphoma	AITL	PARTIAL	Peripheral T cell lymphoma, NOS	TCL	3	3	1	3	1	1	3	3	2	0.05	1	1	1	1	3	1	1	3	2	1	1	3	1	3	1	1	1	3	3	1	3	1	1	1	2	2	1	3	2	2		1	1
3	E0334 B	Hodgkin Lymphoma	cHL	FULL	Classic Hodgkin Lymphoma	HL	0	1	1	3 (vari)	1	1	3	2	3	0.5	1	3	3	1	1	1	1	3 (dim)	1	1	1	0	1	3	3	1	3	1	1	1	1	1	2	1	1	1	1	1	1	1		1	1
3	E0337 B	Lymphoproliferative Process suggestive of Lymphoma	FL 3A	NONE	Follicular lymphoma, grade 3	FL	3	1	3	3	3	2	1	3	1	<1%	1	1	1	1	1	1	1	1	3	2	1	1	1	1	1	1	3	1	1	1	1	1	1	1	1	1	1	1	1	1		1	1
3	E0339 B	High grade Diffuse Large Cell Lymphoma	DL	FULL	Diffuse large B cell lymphoma, non-germinal center type	DLBCL	3	1	3	3	1	1	3	2	3	0.4	1	1	1	1	1	1	1	1	1	3	1	2	1	1	1	1	3	1	1	1	1	1	2	1	1	1	2	1	1	1		1	1
3	E0340 B	Low grade Small Cell mucosa associated Lymphoma (Maltoma)	MZL	FULL	Marginal zone lymphoma	MZL	3	1	3	3	1	1	2	3	1	<1%	1	1	1	1	1	1	1	1	1	1	1	1	1	1	1	1	3	1	1	1	1	1	1	1	1	1	1	1	1	1		1	1
3	E0342 B	Non-classifiable lymphoma	HGBL	NONE	Diffuse large B cell lymphoma, non-germinal center type	DLBCL	0	1	3	3	1	1	3	3	2	0.2	1	1	1	1	3	1	1	1	1	1	1	1	1	1	1	1	3	1	1	1	1	1	3	1	1	1	1	1	1	1		1	1
3	E0343 B	High grade Diffuse Lymphoma, with marked artifice	DL	FULL	Diffuse large B cell lymphoma, non-germinal center type	DLBCL	0	1	3	3	2	3	3	1	2	0.5	1	1	1	1	1	1	1	1	3 (dim)	3	3	1	1	1	1	1	3	1	1	1	1	1	3	1	1	1	1	1	1	1		1	1
3	E0344 B	Low grade Diffuse Small Cell Lymphoma	DL	NONE	Diffuse large B cell lymphoma, non-germinal center type	DLBCL	0	1	3	3	1	1	1	3	2	<1%	1	1	1	1	1	1	1	1	3	3 (dim)	1	1	1	1	1	1	3	1	1	1	1	1	1	1	1	1	1	1	1	1		1	1
3	E0345 B	Low grade Diffuse Small Cell Lymphoma (Lymphoma/Leukemia)	ML, DL	NONE	Diffuse large B cell lymphoma, non-germinal center type	DLBCL	0	1	3	3	1	1	1	3	2	<1%	1	1	1	1	1	3	1	1	1	1	1	1	1	1	1	1	3 (dim)	1	1	1	1	1	2	1	1	1	1	1	1	1		3	1
3	E0348 A	Small Cell Nodular Lymphoma	FL 1-2	PARTIAL	Follicular lymphoma, grade 1-2	FL	0	1	3	3	3	3	1	3	1	<1%	1	1	1	1	1	1	1	1	3	3	1	1	1	1	1	1	3	1	1	1	1	1	1	1	1	1	1	1	1	1		3	1
3	E0349 B	High grade Large Cell Lymphoma	HGBL	FULL	Diffuse large B cell lymphoma, non-germinal center type	DLBCL	0	1	2	3	2	1	3	3	1	<1%	1	1	1	1	1	1	1	1	1	1	1	1	1	1	1	1	3	1	1	1	1	1	1	1	1	1	1	1	1	1		1	1
3	E0350 B	High grade Diffuse Lymphoma	HGBL	FULL	Diffuse large B cell lymphoma, germinal center type	DLBCL	0	1	3	3	3	3	1	2	3	0.8	1	3	1	1	1	1	1	3	3	1	1	3	1	1	1	1	3	1	1	1	1	1	1	1	1	1	1	1	1	1		1	1
3	E0353 B	Mixed Cellularity Hodgkin Lymphoma	cHL	FULL	Classic Hodgkin Lymphoma	HL	0	1	1	3 (vari)	1	1	3	1	2	<1%	1	3	1	1	0	1	1	1	1	1	1	0	1	2	3	1	1	1	1	1	1	1	3	1	1	1	1	1	1	1		1	1
3	E0354 A	High grade Diffuse Lymphoma	cHL, DLBCL (spectrum) - EBV?	FULL	Diffuse large B cell lymphoma, non-germinal center type	DLBCL	0	1	3	3	1	1	2	2	2	<1%	1	1	1	1	1	3	1	1	1	1	1	0	1	1	1	1	3	1	1	1	1	1	1	1	1	1	1	1	1	1		1	1
3	E0355 B	Nodular Sclerosis classical hodgkin lymphoma	cHL	FULL	Classic Hodgkin Lymphoma	HL	0	1	2	3 (vari)	1	1	3	1	2	<1%	1	2	1	1	0	1	1	1	1	1	1	0	1	2	2	1	1	1	1	1	1	1	3	1	1	1	1	1	1	1		1	1
3	E0356 B	High grade, Diffuse Pleomorphic Lymphoma	ALCL, anaplastic LBCL, DL	FULL	Diffuse large B cell lymphoma, non-germinal center type	DLBCL	0	1	3	3	1	2	3	1	3	0.25	1	1	1	1	1	1	1	1	3	3	1	1	1	1	1	1	3	1	1	1	1	1	0	1	1	1	1	1	1	1		1	1
3	E0357 B	Small Cell Follicular Lymphoma	DL arising from FL	NONE	Diffuse large B cell lymphoma, germinal center type	DLBCL	0	1	3	3	2	1	1	3	2	0.05	1	1	1	1	1	1	1	1	3	3	1	1	1	1	1	1	3	1	1	1	1	1	1	1	1	1	1	1	1	1		1	2
4	E0362 B	Lymphoma	FL (1-2)	PARTIAL	Follicular lymphoma, grade 1-2	FL	3	1	3	3	3	3 (dim)	1	3	1	anitgen?	1	1	1	1	1	1	1	1	1	3	1	1	1	1	1	1	3	1	1	1	1	1	1	1	1	1	1	1	1	1		2	1
4	E0364 B	Low grade Small Cell Lymphoma	DL plasamcytic diff, DL	NONE	Diffuse large B cell lymphoma, germinal center type	DLBCL	3	1	3	3	3	3	1	3	1	anitgen?	1	1	1	1	1	1	1	1	3	3	1	1	1	1	1	1	3	1	1	1	1	1	1	1	1	1	1	1	1	1		1	3
4	E0365 B	HIgh grade Diffuse Large Cell Lymphoma	DL plasamcytic diff, ALCL, DL	FULL	Diffuse large B cell lymphoma, germinal center type	DLBCL	3	1	3	3	3	2 (dim)	1	1	1	anitgen?	1	1	1	1	1	1	1	1	3	3	1	1	1	2	1	1	3	1	1	1	1	1	1	1	1	1	1	1	1	1		1	1
4	E0366 B	High grade Large Cell Lymphoma, Anaplastic Lymphoma	cHL	NONE	Classic Hodgkin Lymphoma	HL	1	1	3 (vari)	3 (dim)	1	1	3	3 (dim)	3 (dim)	anitgen?	1	1	1	1	0	1	1	1	1	1	1	0	1	3	3	1	1	1	1	1	1	1	3	1	1	1	1	1	1	1		1	1
4	E0367 B	Diffuse Small Cell Lymphoma	small B (MZL), ?PTCL	NONE	NK/T cell lymphoma	NKTCL	3 (dim)	3	1	1	1	1	1	1	2	anitgen?	1	3	2	1	1	1	1	1	1	1	1	3	1	1	1	1	1	3	3	1	1	1	1	1	1	3	3 (dim)	3	3	1		1	1
4	E0369 B	Small Cell Pleomorphic Lymphoma	PTCL, DL, EBV+, DL	NONE	Diffuse large B cell lymphoma, non-germinal center type	DLBCL	3	1	3	3	1	1	2 (dim)	3	1	anitgen?	1	1	1	1	1	1	1	1	3	2	1	1	1	2	1	1	3	1	1	1	1	1	1	1	1	1	1	1	1	1		1	1
4	E0372 B	Small Cell Mixed Lymphoma	NK/T, THRLBL, DL	NONE	T cell histiocyte rich large B cell lymphoma	DLBCL	3	1	3	3	1	3 (dim)	1	3	1	anitgen?	1	1	1	1	1	1	1	1	1	1	1	0	1	1	1	1	3	1	1	1	1	1	1	1	1	1	1	1	1	1		1	1
4	E0376 B	Diffuse Small Cell Lymphoma	MZL vs TCL	PARTIAL	Mantle cell lymphoma	MCL	3	1	3	3	1	1	2	3	1	anitgen?	1	2	1	1	3	3	1	1	1	1	1	3	1	1	1	1	3 (dim)	1	1	1	1	1	1	1	1	1	1	1	1	1		1	1
4	E0378 B	Follicular Lymphoma I	FL (1-2)	PARTIAL	Mantle cell lymphoma	MCL	3	1	3	3	1	1	1	3	1	anitgen?	1	1	1	1	3	3	3	1	1	1	3 (dim)	3	1	1	1	1	3	1	1	1	1	1	3	1	1	1	1	1	1	1		3	1
4	E0380 B	HIgh grade Diffuse Small Cell Lymphoma	Small B (MZL, CLL)	PARTIAL	Marginal zone lymphoma	MZL	3	1	3	3	1	1	1	2	1	anitgen?	1	1	1	1	1	1	1	1	1	1	1	1	1	2	1	1	3	1	1	1	1	1	1	1	1	1	1	1	1	1		3	2
4	E0381 B	Diffuse Small Cell Lymphoma	THLBCL, NLPHL	NONE	Nodular lymphocyte predominant Hodgkin lymphoma	HL	3	1	3	0	1	1	1	2	1	anitgen?	1	1	1	1	1	1	1	1	1	1	1	3	1	1	1	1	3	1	1	1	1	1	1	1	1	1	1	1	1	1		1	1
4	E0382 B	Diffuse Small Cell Lymphoma	ALCL, DL, anaplastic plasma cell, DL	NONE	Diffuse large B cell lymphoma, NOS	DLBCL	3	1	2 (dim)	1	1	1	1	1	1	anitgen?	1	1	1	1	1	1	1	1	1	1	1	0	1	1	1	1	1	1	1	1	1	1	1	1	1	1	1	1	1	1		1	1
4	E0384 B	Mixed Cellularity Hodgkin´s Lymphoma	cHL	FULL	Classic Hodgkin Lymphoma	HL	1	1	1	3 (dim)	1	1	3 (dim)	1	3 (dim)	anitgen?	1	3	2	1	1	1	1	3 (dim)	2	1	1	1	1	3	3	1	1	1	1	1	1	1	3	1	1	1	1	2	1	1		1	1
4	E0387 B	Diffuse Large Cell Lymphoma	cHL	PARTIAL	Classic Hodgkin Lymphoma	HL	1	1	1	1	1	1	3	3 (dim)	1	anitgen?	1	1	1	1	1	1	1	1	1	1	1	1	1	3	3	1	2 (dim)	1	1	1	1	1	3	1	1	1	1	1	1	1		1	1
4	E0388 B	Difusse Small Cell Lymphoma	MZL, PTCL, CLL, ALL	PARTIAL	Marginal zone lymphoma	MZL	3	1	3	3 (mod)	1	1	1	1	1	anitgen?	1	1	1	1	3 (dim)	1	1	1	1	1	1	3 (dim)	1	1	1	1	3	1	1	1	1	1	1	1	1	1	1	1	1	1		1	1
4	E0390 A	Non-specific lymphadenopathy chronic	NLPHL, PTCL, cHL	NONE	Nodular lymphocyte predominant Hodgkin lymphoma	HL	3	1	3	2 (dim)	1	1	2 (dim)	3	1	anitgen?	1	1	1	1	1	1	1	3 (dim)	1	1	1	1	1	1	1	1	3	1	1	1	1	1	3	1	1	1	1	1	1	1		1	1
4	E0391 B	HIgh grade Diffuse Large Cell Lymphoma	HGBL	FULL	Diffuse large B cell lymphoma, non-germinal center type	DLBCL	3	1	3	3	1	2 (dim)	3	3 (dim)	2	anitgen?	1	1	1	1	1	1	1	1	3	3 (dim)	1	1	1	1	1	1	3	1	1	1	1	1	1	1	1	1	1	1	1	1		1	1
4	E0393 A	Lymphoid Hyperplasia	DL	NONE	Diffuse large B cell lymphoma, germinal center type	DLBCL	3	1	3	0	3	1	1	3	2	anitgen?	1	1	1	1	1	1	1	1	3	3		3	1	1	1	1	3 (dim)	0	1	1	0	1	3	3	1	1	1	1	1	1		1	1
4	E0394 B	HIgh grade Diffuse Large Cell Lymphoma	DL	PARTIAL	Diffuse large B cell lymphoma, non-germinal center type	DLBCL	3	1	3	3	1	2 (dim)	3	1	2	anitgen?	1	1	1	1	1	1	1	1	3	3	1	1	1	1	1	1	3	1	1	1	1	1	3	1	1	1	1	1	1	1		1	1
4	E0397 B	HIgh grade Diffuse Large Cell Lymphoma	DL	FULL	Diffuse large B cell lymphoma, non-germinal center type	DLBCL	3	1	3	3	2	3	3 (dim)	3	3 (dim)	anitgen?	1	1	1	1	1	1	1	1	1	1	1	3	1	1	1	1	2 (dim)	1	1	1	1	1	1	1	1	1	1	1	1	1		3	1
4	E0401 B	Low grade DIffuse Small Cell Lymphoma with Plasmacytoid Differentiation	MZL, PTCL, cHL	FULL	Marginal zone lymphoma	MZL	3	1	0	1	1	1	2 (dim)	3	2 (dim)	<1%	1	1	1	1	1	1	1	1	1	1	1	3	1	1	1	1	3	1	1	1	1	1	1	1	1	1	1	1	1	1		1	1
4	E0403 B	DIffuse Small Cell Lymphoma	Small B (CLL) ALL	PARTIAL	Follicular lymphoma, grade 1-2	FL	3	1	3	3	3	3	1	3	3	0.2	1	0	0	0	1	1	1	1	3	2	1	1	1	1	1	0	3	1	1	1	1	1	1	0	1	1	1	0	0	0		1	1
4	E0404 B	Follicular Lymphoma	FL (1-2)	FULL	Follicular lymphoma, grade 1-2	FL	3	1	3	3	3	2 (dim)	1	3	1	anitgen?	1	1	1	1	1	1	1	1	1	2	1	1	1	1	1	1	3 (dim)	1	1	1	1	1	3	1	1	1	1	1	1	1		1	3
4	E0407 B	Low grade Diffuse Small Cell Lymphoma	Small B (ML, CLL)	PARTIAL	Marginal zone lymphoma	MZL	3	1	3	3 (dim)	1	1	1	3	1	anitgen?	1	1	1	1	1	1	1	1	1	1	1	3	1	1	1	1	1	1	1	1	1	1	1	1	1	1	1	1	1	1		2	1
4	E0409 A	Lymphoid Hyperplasia	DL	NONE	Diffuse large B cell lymphoma, germinal center type	DLBCL	3	1	3	3	3 (dim)	1	3	1	2 (dim)	anitgen?	1	1	1	1	1	3 (dim)	1	1	3	1	2 (dim)	1	1	1	1	1	3	1	1	1	1	1	1	1	1	1	1	1	1	1		3	1
4	E0411 B	HIgh grade Diffuse Large Cell Lymphoma	DL	FULL	Diffuse large B cell lymphoma, non-germinal center type	DLBCL	3	1	3	3	1	3 (dim)	3	3	2 (dim)	anitgen?	1	1	1	1	1	3 (dim)	1	1	3	3	1	3 (dim)	1	1	1	1	3	1	1	1	1	1	1	1	1	1	1	1	1	1		1	1
4	E0415 B	High grade Diffuse Large Cell Pleomorphic Lymphoma	cHL, histiocytic, ALCL, DL	FULL	Diffuse large B cell lymphoma, non-germinal center type	DLBCL	0	1	2	3 (mod)	1	1	1	1	3	anitgen?	0	2	1	1	1	1	1	1	3	1	1	0	1	0	1	1	3	0	1	1	1	1	1	1	1	1	1	1	1	1		1	1
4	E0421 A	High grade Invasive ductual Adenocarcinoma	large cell (T/B), cHL, DL	NONE	Diffuse large B cell lymphoma, non-germinal center type	DLBCL	3	1	3	3	1	1	2	3	2 (dim)	anitgen?	1	1	1	1	1	1	1	1	1	1	3 (dim)	3	1	1	1	1	3	1	1	1	1	1	3	1	1	1	1	1	1	1		1	1
4	E0422 B	Low grade Diffuse Small Cell Lymphoma	DL	NONE	Diffuse large B cell lymphoma, germinal center type	DLBCL	3	1	3	3	3	3	1	3	3	anitgen?	1	1	1	1	1	1	1	3 (dim)	3	1	1	1	1	1	1	1	3 (dim)	1	1	1	1	1	1	1	1	1	1	1	1	1		1	1
4	E0423 B	Hodgkin Lymphoma	ML, CLL	NONE	Marginal zone lymphoma	MZL	3 (dim)	1	2	2 (dim)	1	1	1	1	1	anitgen?	1	1	1	1	3	1	1	1	1	1	1	3	1	1	1	1	2 (dim)	1	1	1	1	1	1	1	1	1	1	1	1	1		1	1
4	E0424 A	Hyperplasia	cHL,PTCL	NONE	Classic Hodgkin Lymphoma	HL	1	1	1	3 (mod)	1	1	1	E	2 (dim)	anitgen?	1	1	1	1	1	1	1	1	1	1	1	1	1	3	3	1	2 (dim)	1	1	1	1	1	1	1	1	1	1	1	1	1		1	1
4	E0425 B	HIgh grade Diffuse Large Cell Lymphoma	DL, cHL	FULL	Diffuse large B cell lymphoma, non-germinal center type	DLBCL	3	1	2	3 (dim)	1	1	1	2	1	anitgen?	1	1	1	1	1	1	1	1	1	1	1	3	1	1	1	1	2 (dim)	1	1	1	1	1	1	1	1	1	1	1	1	1		1	1
4	E0427 B	HIgh grade Large Cell Lymphoma	HGBL	FULL	Diffuse large B cell lymphoma, germinal center type	DLBCL	3	1	3	3	2	2 (dim)	3	3	2 (dim)	anitgen?	1	1	1	1	1	1	1	1	3	1	1	1	1	1	1	1	3	1	1	1	1	1	1	1	1	1	1	1	1	1		1	1
4	E0431 B	HIgh Grade Pleomorphic Lymphoma	cHL	PARTIAL	Anaplastic large cell lymphoma, ALK negative	TCL	3 (vari)	1	0	0	1	1	3	2	3	anitgen?	1	1	1	1	1	1	1	1	0	1	1	3	1	3	2	1	1	1	1	1	2 (dim)	1	3	1	1	0	1	3	3	3		1	1
4	E0435 B	DIffuse Small Cell Lymphoma	Small B (CLL, ML), cHL?	PARTIAL	Follicular lymphoma, grade 1-2	FL	3	1	3	0	3	1	1	3	1	anitgen?	1	2	1	1	1	1	1	1	2	1	2 (dim)	0	1	1	1	1	2	1	1	1	1	1	1	1	1	1	1	1	1	1		1	1
4	E0436 B	Mixed Cellularity Hodgkin´s Lymphoma	cHL	FULL	Classic Hodgkin Lymphoma	HL	0	1	1	3 (dim)	1	1	3	2	2	anitgen?	1	3	2	1	0	1	1	2 (dim)	2	1	1	0	1	2	1	1	1	1	1	1	1	1	2	1	1	1	1	1	1	1		1	1
4	E0439 B	HIgh grade Large Cell Lymphoma	DL	FULL	Diffuse large B cell lymphoma, germinal center type	DLBCL	3	1	3	3	3	1	3 (dim)	3	1	anitgen?	1	1	1	1	3 (dim)	1	1	1	2	1	3 (dim)	1	1	1	1	1	3	1	1	1	1	1	3	1	1	1	1	1	1	1		1	1
4	E0442 B	High grade Diffuse Lymphoma	DL	FULL	Diffuse large B cell lymphoma, non-germinal center type	DLBCL	3	1	3	3	1	2 (dim)	3	2	2	anitgen?	1	1	1	1	1	1	1	1	1	2	1	3	1	3	1	1	3	1	1	1	1	1	1	1	1	1	1	1	1	1		3	3
4	E0444 B	HIgh grade Large Cell Lymphoma	DL	FULL	Diffuse large B cell lymphoma, germinal center type	DLBCL	3	1	3	3	3	2 (dim)	2 (dim)	3	2	anitgen?	1	2	1	1	1	1	1	1	3	3	1	1	1	1	1	1	3	1	1	1	1	1	1	1	1	1	1	1	1	1		1	1
4	E0445 B	Low grade Diffuse Small Cell Lymphoma	Small B (ML, FL)	PARTIAL	Mantle cell lymphoma	MCL	3	1	3	3	1	1	1	3	1	anitgen?	1	1	1	1	3	3	3	1	1	1	3 (dim)	3 (dim)	1	1	1	1	3	1	1	1	1	1	3	1	1	1	1	1	1	1		1	1
4	E0446 B	Hodgkín´s Lymphoma and/or Large Cell mediastinum lymphoma	ALCL, cHL, histiocytic	FULL	Classic Hodgkin Lymphoma	HL	3	1	2	2 (dim)	1	1	1	2 (dim)	2 (dim)	anitgen?	1	2	1	1	1	1	1	1	1	1	1	3	1	2 (dim)	3	1	2 (dim)	1	1	1	1	1	1	1	1	3	1	1	1	1		1	1
4	E0447 B	Small Cell Nodular lymphoma, grade I	FL vs MZL, cHL	FULL	Follicular lymphoma, grade 1-2	FL	3	1	3	3	3	1	1	3	1	anitgen?	1	1	1	1	1	1	1	1	3	2	1	0	1	1	1	1	3	1	1	1	1	1	3	1	1	1	1	1	1	1		1	1
4	E0450 B	Large Cell Lymphoma and/or Undifferentiated carcinoma	NK/T, DL, ALCL	PARTIAL	Diffuse large B cell lymphoma, germinal center type	DLBCL	3	1	3	3	1	3	0	2	1	anitgen?	1	0	1	1	1	1	1	1	2	3	1	3	1	3	1	1	3	1	1	1	1	1	1	1	0	1	1	1	1	1		1	1
4	E0451 C	Hodgkin´s Lymphoma	NLP vs cHL vs PTCL	FULL	Classic Hodgkin Lymphoma	HL	1	1	1	1	1	1	1	2	1	anitgen?	1	1		1	1	1	1	1	1	1	1	1	1	3	1	1	2 (dim)	1	1	1	1	1	3	1	1	1	1	1	1	1		1	1
4	E0453 C	Small Cell Nodular Lymphoma	FL vs MCL	PARTIAL	Mantle celll lymphoma	MCL	3	1	3	3	1	1	1	3	1	anitgen?	0	0	0	0	3	3	3	1	1	1	3 (dim)	3	1	1	1	0	3	1	1	1	1	1	1	1	1	1	1	0	0	0		1	1
4	E0456 B	Diffuse Lymphoma with Plasmacytoid Differentiation	DL	FULL	Diffuse large B cell lymphoma, non-germinal center type	DLBCL	3	1	3	3	1	0	2 (dim)	3	2	anitgen?	1	2	1	1	3	1	1	1	3	3	1	1	1	2	1	1	3	1	1	1	1	1	1	1	1	1	1	1	1	1		1	2
4	E0457 B	Diffuse Small Cell Lymphoma, Lymphoma	CLL vs ML	PARTIAL	Marginal zone lymphoma	MZL	3	1	3	3	1	0	1	3	1	anitgen?	1	1	1	1	3	0	1	1	1	1	3 (dim)	3	1	1	1	1	3	1	1	1	1	1	1	1	1	1	1	1	1	1		3	3
4	E0459 B	Cutaneous Diffuse Large Cell Lymphoma	Lymphohistocystic lesion		CD30 positive lymphoproliferative disorder	TCL	3	1	0	3	1	3 (dim)	1	3	2	anitgen?	1	1	1	1	1	1	1	1	3	1	3	1	1	3	1	1	3	1	1	1	1	1	1	1	1	1	1	1	1	1		1	1
4	E0464 A	Hyperplasia	ALCL, DL	NONE	Diffuse large B cell lymphoma, non-germinal center type	DLBCL	3	0	0	3 (dim)	1	0	3 (dim)	1	2	anitgen?	1	3	2	1	1	0	1	1	1	1	1	0	1	1	1	1	1	1	1	1	1	1	2	1	1	1	1	1	1	1		1	1
4	E0466 B	HIgh grade Large Cell Lymphoma	HGBL, ALCL, cHL	PARTIAL	Anaplastic large cell lymphoma, ALK negative	TCL	1	0	1	1	1	1	2 (dim)	2 (dim)	0	anitgen?	1	1	1	1	1	1	0	1	1	1	0	3	1	3	1	1	1	1	1	1	1	1	1	1	0	1	1	3	3	2		1	1
4	E0467 B	Mixed Cellularity Hodgkin Lymphoma	cHL, PTCL	FULL	Classic Hodgkin Lymphoma	HL	0	1	1	3 (dim)	1	1	2 (dim)	1	1	anitgen?	1	3	1	1	1	1	1	1	1	1	1	0	1	3	2	1	1	1	1	1	1	1	2	1	1	1	1	1	1	1		1	1
4	E0469 B	Cutaneous Small Cell Lymphoma with Plasmacytoid Differentiation	cHL, MZL		CD30 positive lymphoproliferative disorder	TCL	0	1	1	3 (mod)	1	1	2 (dim)	2 (dim)	2	anitgen?	1	1	1	1	1	0	1	1	1	1	1	0	1	3	2	1	3	1	1	1	1	1	2	1	1	1	1	1	1	1		1	1
4	E0471 B	Small Cell Lymphoproliferative Process	MZL with amyloid	PARTIAL	Follicular lymphoma, grade 1-2	FL	3	1	3	3	3	1	1	3	1	anitgen?	1	1	1	1	1	0	1	1	3	1	1	1	1	1	1	1	2	1	1	1	1	1	1	1	1	1	1	1	1	1		1	3
4	E0475 B	B Lymphoma	DL with plasma diff, DL	PARTIAL	Diffuse large B cell lymphoma, germinal center type	DLBCL	3	1	3	3	3 (dim)	3 (dim)	1	1	2	anitgen?	1	1	1	1	1	0	1	1	1	3	1	1	1	1	1	1	3	1	1	1	1	1	1	1	1	1	1	1	1	1		1	1
4	E0477 B	Large and Small Follicular Lymphoma	Small B (CLL, ML)	PARTIAL	Follicular lymphoma, grade 1-2	FL	3	1	3	3	1	3	1	3	0	anitgen?	1	0	0	0	1	0	1	1	3	2	3	1	1	1	1	0	3	1	1	1	1	1	2	0	1	1	1	0	0	0		3	1
4	E0478 B	Large Cell Lymphoma	DL with plasmacytic diff, DL	FULL	Diffuse large B cell lymphoma, non-germinal center type	DLBCL	3	1	3	1	1	1	1	1	1	anitgen?	1	1	1	1	0	0	1	1	1	1	1	0	0	1	1	1	1	0	1	1	1	1	1	1	1	1	1	1	1	1		0	1
4	E0480 B	DIffuse Small Cell Lymphoma	ML (vs CLL)	PARTIAL	Mantle cell lymphoma	MCL	3	1	3	3	1	1	0	3	0	anitgen?	1	1	1	1	0	3	3	0	1	1	3 (dim)	3	1	1	1	1	3	1	1	1	1	1	3	1	1	1	1	1	1	1		1	1
4	E0482 B	HIgh grade Diffuse Large Cell Lymphoma	Plasmacytic large B vs NK/T	PARTIAL	Peripheral T cell lymphoma, NOS	TCL	3	3	0	0	1	1	1	3	1	anitgen?	0	2	2	0	1	0	0	1	1	0	0	3	1	1	1	0	1	1	0	1	1	1	1	0	0	1	1	0	0	0		1	1
4	E0483 B	Low grade Diffuse Small Cell Lymphoma	DL (with Kucki), DL	NONE	Diffuse large B cell lymphoma, non-germinal center type	DLBCL	3	1	3	3 (mod)	1	2 (dim)	0	1	0	anitgen?	0	1	1	0	3	0	1	0	1	2	0	1	1	1	1	0	3 (dim)	1	1	1	1	0	1	1	0	1	1	0	0	1		2	1
4	E0484 C	High grade Diffuse Lymphoma	DL, blastic ML	PARTIAL	Mantle cell lymphoma	MCL	3	1	3	3	1	1	2 (dim)	3	1	anitgen?	0	1	1	1	3	3	3	1	1	1	3 (dim)	3	1	1	1	0	3 (dim)	1	1	1	1	1	3	1	1	1	1	1	1	1		1	1
5	E0486 B	cHL vs NLPHL variant pattern vs THRLBL	cHL vs NLPHL variant pattern vs THRLBL	NONE	cHL vs NLPHL variant pattern vs THRLBL	DLBCL	0	1	3	3	1	3	1	3	1	1	1	1	N/A	1	1	1	1	1					1	1	1	1																1	1
5	E0487 B	MZL, ?transformation	MZL, ?transformation	FULL	MZL, ?transformation	MZL	3	1	3	3 (dim)	1	1	1	3	1	0	1	1	N/A	1	0	1	1	1	1	1	1	2	1	0	1	1																1	1
5	E0489 B	DL	DL	FULL	DL	DLBCL	3	1	3	3	1	1	2	3	2	50	1	1	N/A	1	1	1	1	1					1	1	1	1																1	1
5	E0491 B	MZL, small B	MZL, small B	PARTIAL	MZL, small B	MZL	3	1	3	3	1	1	1	3	1	0	1	1	N/A	1	1	1	1	1	1	1	1	2	2	1	1	1																1	1
5	E0492 B	MF, PTCL, NK	MF, PTCL, NK	NONE	MF, PTCL, NK	NKTCL	3	3	1	1	1	1	1	3	3	5	1	3	N/A	1	1	1	1	1	1	1	1	3	1	1	1	1	1	1	1	1	1	1	1	1	1	1	3	3	3	1		1	1
5	E0493 C	cHL	cHL	FULL	cHL	HL	1	1	1	1	1	1	3	1	1	5	1	1	N/A	0	1	1	1	1					1	3	3	1																1	1
5	E0494 B	DL	DL	NONE	DL	DLBCL	1	1	3	3	1	3	3	3	3	75	1	1	N/A	1	1	1	1	1					1	1	1	1																1	1
5	E0495 B	NK	NK	FULL	NK	NKTCL	3	3	1	1	1	1	1	1	1	10	1	3	N/A	1	1	1	1	1	1	1	1	1	1	2	1	1	1	3	1	1	1	1	1	1	1	2	3	3	3	1		1	1
5	E0497 B	DL vs TCL	DL vs TCL	PARTIAL	DL vs TCL	TCL	3	1	1	2	3	3	1	3	3	0	1	3	N/A	1	3	1	1	3					1	3	2	1	1	3	1	1	2	1	1	1	1	1	1	1	1	1		1	1
5	E0498 B	cHL, NLPHL?	cHL, NLPHL?	N/A	cHL, NLPHL?	HL	3	1	3	3	1	3	1	1	1	0	1	1	N/A	1	1	1	1	1					1	1	1	1																1	1
5	E0499 B	DL with plasmacytic	DL with plasmacytic	NONE	DL with plasmacytic	DLBCL	3	1	3	3	1	2	3	2	1	0	1	1	N/A	0	1	1	1	1					1	1	1	1																1	1
5	E0503 B	small B with plasmacytic diff (LPL)	small B with plasmacytic diff (LPL)	NONE	small B with plasmacytic diff (LPL)	NKTCL	3	3	1	1	1	1	1	1	1	0	1	3	N/A	1	1	1	1	1	1	1	1	3	1	1	1	1	1	3	1	1	1	1	1	1	1	3	3	3	3	2		1	1
5	E0508 B	DL	DL	FULL	DL	DLBCL	0	1	1	3	1	1	2	2	2	0	1	1	N/A	1	1	1	1	1					1	2	1	1																1	1
5	E0509 B	ML	ML	PARTIAL	ML	MCL	3	1	3	3	1	1	1	3	2	0	1	1	N/A	1	3	3	3	1					1	1	1	1																1	1
5	E0512 B	cHL vs NLPHL with variant pattern	cHL vs NLPHL with variant pattern	PARTIAL	cHL vs NLPHL with variant pattern	HL	3	1	3	3	1	3	1	1	2	0	1	1	N/A	1	1	1	1	3					1	1	1	1																1	1
5	E0513 C	cHL	cHL	FULL	cHL	HL	1	1	1	1	1	1	3	1	2	0	1	3	N/A	1	1	1	1	2					1	3	3	1																1	1
5	E0515 B	DL with plasmacytic	DL with plasmacytic	NONE	DL with plasmacytic	DLBCL	3	1	3	3	1	1	3	3	3	0	1	1	N/A	1	1	1	1	1					1	1	1	1																1	1
5	E0516 B	DL, immunoblastic	DL, immunoblastic	FULL	DL, immunoblastic	DLBCL	2	1	1	2 (dim)	1	1	2	3	2	1	1	1	N/A	1	1	1	1	1					1	2	1	1																1	1
5	E0517 C	CLL, ML	CLL, ML	NONE	CLL, ML	FL	3	1	3	3	3	3	1	3	1	0	1	1	N/A	1	1	1	1	1					1	1	1	1																1	1
5	E0518 B	DL	DL	FULL	DL	DLBCL	3	1	3	3	3	3	1	3	3	1	1	1	N/A	1	1	1	1	1					1	1	1	1																1	1
5	E0519 B	DL	DL	NONE	DL	DLBCL	3	1	3	3	3	3	1	3	3	25	1	1	N/A	1	1	1	1	1					1	1	1	1																1	1
5	E0520 B	DL vs cHL	DL vs cHL	NONE	DL vs cHL	DLBCL	3	1	3	2 (dim)	1	1	1	1	1	0	1	1	N/A	1	1	1	1	1					1	1	1	1																1	1
5	E0522 B	PTCL	PTCL	PARTIAL	PTCL	NKTCL	3	3	1	1	1	1	2	3	3	50	1	3	N/A	1	1	1	1	1	1	1	1	3	1	3	1	1	1	1	1	1	2	1	1	1	2	1	1	3	3	2		1	1
5	E0525 B	cHL	cHL	FULL	cHL	HL	2	1	1	1	1	1	3	2	1	0	1	3	N/A	1	1	1	1	3					1	3	3	1																1	1
5	E0526 C	DL	DL	NONE	DL	DLBCL	2	0	3	3	1	2	1	3	2	0	0	1	N/A	1	1	1	1	1					1	1	1	1																1	1
5	E0530 B	DL	DL	NONE	DL	DLBCL	3	1	3	3	2	3	1	3	2	1	1	1	N/A	1	1	1	1	1					1	1	1	1																1	1
5	E0532 B	cHL	cHL	FULL	cHL	HL	2	1	1	1	1	1	3	3	2	1	1	3	N/A	1	1	1	1	3					1	3	2	1																1	1
5	E0533 B	ML	ML	PARTIAL	ML	MCL	3	1	3	3	1	1	1	3	1	0	1	1	N/A	1	3	3	3	1					1	1	1	1																1	1
5	E0535 B	DL	DL	NONE	DL	DLBCL	0	1	3	3	3	1	1	3	3	1	1	1	N/A	1	3	1	1	3					1	1	1	1																1	1
5	E0537 C	cHL	cHL	FULL	cHL	HL	1	1	1	1	1	1	1	2	3	0	1	3	N/A	1	1	1	1	1					1	1	1	1																1	1
5	E0538 B	DL arsing from FL	DL arsing from FL	NONE	DL arsing from FL	DLBCL	0	1	3	3	1	2	1	3	1	0	1	1	N/A	1	1	1	1	1					1	1	1	1																1	1
5	E0539 B	cHL	cHL	PARTIAL	cHL	HL	1	1	1	1	1	1	3	1	3	0	1	3	N/A	1	1	1	1	1					1	3	2	1																1	1
5	E0540 B	cHL	cHL	FULL	cHL	HL	1	1	1	1	1	1	2	1	1		0	3	N/A	0	1	1	1	1					1	3	2	0																1	1
5	E0545 B	FL 3A	FL 3A	PARTIAL	FL 3A	FL	3	1	3	3	3	3	1	3	1	0	1	1	N/A	1	1	1	1	1					1	1	1	1																1	1
5	E0546 B	DL	DL	FULL	DL	DLBCL	0	1	3	3	1	3	1	3	1	5	1	1	N/A	1	0	1	1	1					1	1	1	1																1	1
5	E0547 B	DL	DL	NONE	DL	DLBCL	3	1	3	0	1	0	1	0	0		0	0	N/A	0	1	1	0	0					0	3	1	0																1	1
5	E0550 B	BL vs HGBL	BL vs HGBL	FULL	BL vs HGBL	DLBCL	3	1	3	3	3	3	3	1	3	90	1	1	N/A	1	1	1	1	3					1	1	1	1																1	1
5	E0553 B	cHL vs viral	cHL vs viral	FULL	cHL vs viral	HL	1	1	1	0	1	2	3	3	2	90	1	2	N/A	1	1	1	1	2					1	3	3	1																1	1
5	E0556 B	DL	DL	NONE	DL	DLBCL	3	1	3	3	1	2	1	1	2	50	1	1	N/A	1	1	1	1	1					1	1	1	1																1	1
5	E0557 B	DL	DL	FULL	DL	DLBCL	3	1	3	0	1	0	0	0	0		0	0	N/A	0	3	1	0	0					0	1	1	0																1	1
5	E0558 A	LCH?	LCH?	NONE	LCH?	HL	1	1	1	1	1	1	1	3	1	0	1	2	N/A	1	1	1	1	1					1	3	3	1																1	1
5	E0559 B	HGBL, BL	HGBL, BL	NONE	HGBL, BL	DLBCL	3	1	3	3	1	3	1	1	3	5	1	1	N/A	1	1	1	1	1					1	0	1	1																1	1
5	E0560 B	cHL vs reactive	cHL vs reactive	FULL	cHL vs reactive	HL	1	1	1	2 (dim)	1	1	1	3	2	50	1	2	N/A	1	1	1	1	2					1	3	1	1																1	1
5	E0561 B	cHL	cHL	NONE	cHL	NKTCL	3	3	1	1	1	1	1	2	1	5	1	3	N/A	1	1	1	1	1	1	1	1	3	1	1	1	1	1	3	3	1	1	1	1	1	1	3	3	1	3	1		1	1
5	E0562 B	DL	DL	NONE	DL	DLBCL	3	1	3	3	3	2	2	3	2	1	1	1	N/A	1	1	1	1	1					1	1	1	1																1	1
5	E0564 B	cHL	cHL	FULL	cHL	HL	1	1	1	3 (vari)	1	1	3	1	2	5	1	3	N/A	1	1	1	1	3					1	3	1	1																1	1
5	E0566 B	Kucucki vs B cell lymphoma	Kucucki vs B cell lymphoma	FULL	Kucucki vs B cell lymphoma	TCL	3	3	1	1	1	3	3	2	3	50	0	3	N/A	1	1	1	1	1					1	3	1	1		3	2	1	2	1	1	1	1	2	1	1	1	1		1	1
5	E0569 B	PTCL	PTCL	FULL	PTCL	NKTCL	3	3	1	1	1	1	1	2	2	1	1	3		1	1	1	1	1	1	1	1	3	1	3	1	1	1	2	1	1	1	1	1	1	3	1	1	3	3	2		1	1
5	E0570 B	HGBL vs BL	HGBL vs BL	FULL	HGBL vs BL	Agg BCL	3	1	3	3	3	3	2	1	3	90	1	3	N/A	1	1	1	1	3					1	1	1	1																1	1
5	E0571 B	medium B	medium B	PARTIAL	medium B	MCL	3	1	3	3	1	1	2	3	2	1	1	1	N/A	1	3	3	3	1					1	1	1	1																1	1
5	E0572 B	cHL vs DL	cHL vs DL	FULL	cHL vs DL	DLBCL	3	1	2	3	1	2	1	1	1	25	1	1	N/A	1	1	1	1	1					1	1	1	1																1	1
5	E0573 B	DL	DL	NONE	DL	DLBCL	3	1	3	3	3	3	1	3	1	5	1	1	N/A	1	1	1	1	1					1	1	1	1																1	1
5	E0574 B	DL	DL	FULL	DL	DLBCL	3	1	3	3	2	3	3	3	2	50	1	1	N/A	1	1	1	1	1					1	2	1	1																1	1
5	E0575 B	DL	DL	PARTIAL	DL	DLBCL	3	1	3	3	1	1	1	3	2		1	1	N/A	1	1	1	1	1					1	1	1	1																1	1
5	E0576 B	cHL	cHL	FULL	cHL	HL	1	1	1	3 (dim)	1	1	3	1	2	10	1	3	N/A	1	1	1	1	3					1	3	3	1																1	1
5	E0577 B	cHL	cHL	FULL	cHL	HL	1	1	1	1	1	1	1	0	2		1	2	N/A	1	3	1	1	0					1	2	1	1																1	1
5	E0578 B	DL	DL	NONE	DL	DLBCL	3	1	3	3	3	3	3	3	3	75	1	1	N/A	1	1	1	1	1		3		1	1	1	1	1																1	1
5	E0579 B	DL	DL	NONE	DL	DLBCL	3	1	3	3	1	1	1	3	2	1	1	1	N/A	1	1	1	1	1					1	1	1	1																1	1
5	E0580 B	MZL with HRS cells	MZL with HRS cells	FULL	MZL with HRS cells	MZL	3	1	3	3	1	1	2	3	2	5	1	1	N/A	1	1	1	1	1	1	1	2	2	1	1	1	1																1	1
5	E0581 B	DL	DL	FULL	DL	DLBCL	3	1	3	3	1	3	1	3	3	50	1	1	N/A	1	1	1	1	1					1	1	1	1																1	1
5	E0583 B	DL	DL	NONE	DL	DLBCL	3	1	3	3	1	1	1	3	2	5	1	1	N/A	1	1	1	1	1					1	1	1	1																1	1
5	E0588 B	HGBL	HGBL	NONE	HGBL	DLBCL	3	1	3	3	3	3	3	2	3	5	1	3	N/A	1	1	1	1	3					2	1	1	1																1	1
5	E0589 B	DL (anaplastic) vs ALCL	DL (anaplastic) vs ALCL	NONE	DL (anaplastic) vs ALCL	DLBCL	3	1	2	3	1	3	3	3	3	75	1	1	N/A	1	1	1	1	3					1	1	1	1																1	1
5	E0590 B	MZL vs FL	MZL vs FL	PARTIAL	MZL vs FL	FL	3	1	3	3	3	3	1	3	2	50	1	1	N/A	1	0	1	1	1					1	1	1	1																1	1
5	E0592 B	cHL vs NLPHL	cHL vs NLPHL	NONE	cHL vs NLPHL	HL	3	1	3	3	1	3	3	3	3	25	1	1	N/A	1	1	1	1	3					1	1	1	1																1	1
5	E0593 B	plasma cell neoplasm vs carcinoma	plasma cell neoplasm vs carcinoma	FULL	plasma cell neoplasm vs carcinoma	DLBCL	3	1	3	3	3	3	1	3	3	25	1	1	N/A	1	1	1	1	1					1	3	1	1																1	1
5	E0597 B	HGBL vs BL	HGBL vs BL	FULL	HGBL vs BL	Agg BCL	3	1	3	3	3	3	3	1	3	90	1	1	N/A	1	1	1	1	3					1	1	1	1																1	1
5	E0599 B	DL	DL	FULL	DL	DLBCL	3	1	3	3	3	3	1	3	3	10	1	1	N/A	1	1	1	1	1					1	1	1	1																1	1
5	E0600 B	cutaneous TCL	cutaneous TCL	NONE	cutaneous TCL	TCL	3	3	0	1	1	1	1	3	1	5	1	1	N/A	1	3	1	1	3					1	3	1	1		2	2	1	2	1	1	2	1	1	1	1	1	1		1	1
5	E0601 B	DL, leg type vs large T (MF)	DL, leg type vs large T (MF)	PARTIAL	DL, leg type vs large T (MF)	TCL	3	3	1	1	1	2	2	3	3	90	1	1	N/A	1	3	1	1	3	1	1	1	3	1	3	0	1		3	3	1	3	1	1	3	1	1	1	1	1	1		1	1
5	E0602 A	cHL vs PTCL vs MZL	cHL vs PTCL vs MZL	FULL	cHL vs PTCL vs MZL	HL	1	1	1	3 (dim)	1	0	3	3	3		1	1	N/A	0	1	1	1	3					1	3	3	0																1	1
5	E0604 B	FL 1-2	FL 1-2	PARTIAL	FL 1-2	FL	3	1	3	3	3	3	1	3	2	25	1	1	N/A	1	1	1	1	1					1	1	1	1																1	1
5	E0606 B	FL 1-2	FL 1-2	FULL	FL 1-2	FL	3	1	3	3	3	2	1	3	2	25	1	1	N/A	1	1	1	1	1					1	1	1	1																1	1
5	E0607 B	DL with plasmacytic	DL with plasmacytic	FULL	DL with plasmacytic	DLBCL	3	1	3	3 (dim)	1	1	2	3	2	1	1	1	N/A	1	3	1	1	3					1	1	1	1																1	1
5	E0608 B	cHL vs PTCL	cHL vs PTCL	FULL	cHL vs PTCL	TCL	3	1	1	1	1	2	3	3	3	90	1	1	N/A	1	1	1	1	3					1	3	1	1		2	0	0	0	0	0	0	0	0	0	0	0	0		1	1
5	E0609 B	DL	DL	FULL	DL	DLBCL	3	1	3	3	3	3	1	1	3		1	1	N/A	1	1	1	1	3					1	1	1	1																1	1
5	E0610 B	DL	DL	FULL	DL	DLBCL	3	1	3	2 (dim)	1	2	1	3	3	25	1	1	N/A	1	1	1	1	1					1	1	1	1																1	1
5	E0611 B	DL	DL	NONE	DL	DLBCL	3	1	3	3	1	1	3	3	3	50	1	1	N/A	1	1	1	1	1					1	1	1	1																1	1
5	E0612 B	DL	DL	FULL	DL	DLBCL	3	1	3	3	2	2	1	3	2	25	1	1	N/A	1	1	1	1	1					1	1	1	1																1	1
5	E0613 B	DL	DL	FULL	DL	MCL	3	1	3	3	1	1	1	3	1	0	1	1	N/A	1	3	3	3	1					1	1	1	1																1	1
5	E0614 B	FL 3A	FL 3A	NONE	FL 3A	FL	3	1	3	3	2	2	1	3	2	25	1	1	N/A	1	1	1	1	1					1	1	1	1																1	1
5	E0616 C	HGBL vs BL	HGBL vs BL	PARTIAL	HGBL vs BL	DLBCL	3	1	3	3	3	3	1	3	3	0	1	1	N/A	1	1	1	1	3					1	1	1	1																1	1
5	E0617 C	DL	DL	PARTIAL	DL	DLBCL	3	1	3	3	3	2	1	3	3	25	1	1	N/A	1	1	1	1	1					1	1	1	1																1	1
5	E0619 A	FL3A	FL3A	FULL	FL3A	FL	3	1	3	3	3	3	1	3	2	50	1	1	N/A	1	1	1	1	1					1	1	1	1																1	1
5	E0622 B	DL	DL	FULL	DL	DLBCL	3	1	3	3	1	3	3	3	3	50	1	1	N/A	1	1	1	1	1					1	1	1	1																1	1
5	E0623 B	DL	DL	PARTIAL	DL	DLBCL	3	1	3	3	3	3	1	3	3	90	1	1	N/A	1	1	1	1	3					1	3	1	1																1	1
5	E0625 B	MZL VS FL	MZL VS FL	PARTIAL	MZL VS FL	FL	3	1	3	3	3	3	1	3	1	10	1	1	N/A	1	1	1	1	1					1	1	1	1																1	1
5	E0626 B	MZL	MZL	FULL	MZL	MZL	3	1	3	3	1	1	1	3	1	0	1	1	N/A	1	1	1	1	1	1	1	1	2	1	1	1	1																1	1
5	E0627 A	PTCL, ALCL, HGBL	PTCL, ALCL, HGBL	FULL	PTCL, ALCL, HGBL	TCL	1	1	1	1	1	2	2	1	3	1	1	1	N/A	1	1	1	1	1					1	3	1	1		2	1	1	2	1	1	1	1	0	0	2	1	1		1	1
5	E0628 B	ML	ML	PARTIAL	ML	MCL	3	1	3	3	1	1	1	3	2	0	1	1	N/A	1	3	3	3	1					1	1	1	1																1	1
5	E0630 B	DL	DL	NONE	DL	DLBCL	3	1	3	3	1	2	3	3	3	50	1	1	N/A	1	1	1	1	1					1	1	1	1																1	1
5	E0631 B	DL	DL	FULL	DL	DLBCL	3	1	3	3	1	3	3	3	2	25	1	1	N/A	1	1	2	1	1					1	1	1	1																1	1
5	E0639 B	MZL	MZL	NONE	MZL	FL	3	1	3	3	1	3 (dim)	1	3	2	N/A	1	1	N/A	1	1	1	1	2	1	1	0	3	1	2	1	1																1	1
5	E0641 B	MZL	MZL	PARTIAL	MZL	FL	3	1	3	3	3	1	1	3	1	0	1	1	N/A	1	2	1	1	1	1	3	1	3	1	1	1	1																1	1
5	E0642 B	cHL vs NLPHL variant vs THRLBL	cHL vs NLPHL variant vs THRLBL	NONE	cHL vs NLPHL variant vs THRLBL	DLBCL	3	1	3	3 (dim)	1	3	1	3	3	5	1	1	N/A	1	1	1	1	2					1	2	1	1																1	1
5	E0645 B	cHL	cHL	PARTIAL	cHL	HL	3	1	1	3 (dim)	1	?	3	3	2	1	1	3	N/A	1	1	1	1	3					1	3	3	1																1	1
5	E0646 A	DL	DL	FULL	DL	DLBCL	3	1	1	0	1	3	1	1	2	5	1	1	N/A	1	1	1	1	3	0	0	0	0	1	1	1	1	3	0	0	0	0	0	0	0	0	0	0	0	0	0		1	1
5	E0646 B	DL	DL	FULL	DL	DLBCL	3	1	3	3	3	3	1	2	2	90	1	1	N/A	1	1	1	1	1					1	1	1	1	3															1	1
5	E0647 B	cHL vs PTCL	cHL vs PTCL	PARTIAL	cHL vs PTCL	DLBCL	3	1	3	3	1	3	2	3	2	75	1	1	N/A	1	1	1	1	1					1	1	1	1																1	1
5	E0648 B	cHL	cHL	FULL	cHL	HL	1	1	1	3 (mod)	1	3	3	3	3	50	1	1	N/A	1	1	1	1	1					1	3	1	1																1	1
5	E0649 B	ML vs small B	ML vs small B	FULL	ML vs small B	MCL	3	1	3	3	1	1	1	3	2	1	1	1	N/A	1	3	3	3	1					1	1	1	1																1	1
5	E0650 B	cHL	cHL	PARTIAL	cHL	HL	3	1	1	3 (mod)	1	1	1	3	2	25	1	3	N/A	1	1	1	1	2					1	3	3	1																1	1
5	E0651 B	DL	DL	NONE	DL	NKTCL	3	3	1	1	1	1	2	2	3	1	1	3		1	1	1	1	1	1	1	1	3	1	1	1	1	1	2	3	1	1	1	1	1	1	3	1	3	3	2		1	1
5	E0652 B	DL	DL	FULL	DL	DLBCL	1	0	0	1	1	1	3	3	3	0	1	1	N/A	1	3	1	1	3					1	1	2	1																1	1
5	E0653 B	HGBL	HGBL	FULL	HGBL	DLBCL	1	0	3	3	3 (dim)	3	1	1	3	1	1	3	N/A	1	1	1	1	1					1	1	1	1																1	1
5	E0655 B	FL 3B	FL 3B	NONE	FL 3B	FL	3	0	3	3	1	3	?	3	2	50	1	1	N/A	1	1	1	1	1					1	1	1	1																1	1
5	E0658 B	cHL	cHL	FULL	cHL	HL	3	1	1	0	1	1	3	3	2		0	0	N/A	0	1	1	1	3					1	3	3	0																1	1
5	E0659 B	DL	DL	NONE	DL	DLBCL	3	1	3	3	3	3	1	3	2		1	1	N/A	1	1	1	1	2					1	1	1	1																1	1
5	E0660 B	cHL	cHL	FULL	cHL	HL	3	1	3	3 (dim)	1	1	2	3	2	5	1	3	N/A	1	1	1	1	2					1	3	3	1																1	1
5	E0662 B	cHL	cHL	NONE	cHL	DLBCL	3	1	3	1	1	1	1	1	1		1	1	N/A	1	1	1	1	1					1	1	1	1											1					1	1
5	E0663 B	PTCL	PTCL	FULL	PTCL	TCL	3	3	1	1	1	1	2	2	2	25	1	1	N/A	1	3	1	1	1					0	3	1	1		3	2	0	0	0	0	0	0	0	0	0	0	0		1	1
5	E0664 B	cHL vs PTCL	cHL vs PTCL	PARTIAL	cHL vs PTCL	HL	3	0	1	1	1	1	1	2	1	0	1	3	N/A	1	1	1	1	1					1	3	3	1																1	1
5	E0672 B	cHL	cHL	FULL	cHL	DLBCL	2	0	3	3	1	2	3	2	2	5	1	1	N/A	1	1	1	1	1					1	3	1	1																1	1
5	E0677 A	DL, ALCL	DL, ALCL	NONE	DL, ALCL	TCL	1	1	1	1	1	1	1	1	1	5	1	1	N/A	1	1	1	1	2					1	1	1	3		2	1	1	2	0	0	0	0	0	0	0	0	0		1	1
5	E0678 A	DL	DL	NONE	DL	DLBCL	3	1	3	3	1	3	2	3	3	50	1	1	N/A	1	1	1	1	2					1	1	1	1																1	1
5	E0679 A	DL, cutaenous	DL, cutaenous	NONE	DL, cutaenous	DLBCL	3	1	3	3	1	1	1	3	3	25	1	1	N/A	1	1	1	1	1					1	1	1	1																1	1
5	E0680 B	DL	DL	NONE	DL	DLBCL	3	1	3	3	1	3	1	3	3	0	1	1	N/A	1	3	1	1	1					1	1	1	1																1	1
5	E0683 B	DL	DL	NONE	DL	DLBCL	3	0	3	0	1	3	3	3	2	0	1	1	N/A	1	1	1	1	1					1	1	1	1																1	1
5	E0688 B	DL	DL	NONE	DL	DLBCL	3	0	1	3	1	3	3	3	3	5	1	1	N/A	0	1	1	1	1					1	1	1	1																1	1
5	E0689 B	ALCL, PTCL	ALCL, PTCL	PARTIAL	ALCL, PTCL	TCL	3	0	1	1	1	1	3	1	3	0	1	1	N/A	0	1	1	1	1					1	3	1	3		2	0	0	0	0	0	0	0	0	0	0	0	0		1	1
5	E0692 B	HGBL	HGBL	NONE	HGBL	DLBCL	3	0	3	0	1	3	3	3	2		1	0	N/A	1	1	1	1	1					1	1	1	1																1	1
5	E0693 B	PTCL	PTCL	FULL	PTCL	DLBCL	3	1	3	3	1	2	2	3	3	25	1	0	N/A	1	1	1	1	1					1	1	1	1																1	1
5	E0694 B	HGBL vs BL	HGBL vs BL	NONE	HGBL vs BL	DLBCL	1	1	3	3	3	3	1	1	3	90	1	1	N/A	1	1	1	1	3					1	1	1	1																1	1
5	E0695 B	small (CLL/SLL)	small (CLL/SLL)	NONE	small (CLL/SLL)	Agg BCL	3 (dim)	1	1	3 (dim)	3	1	1	3	2	0	3	1	N/A	1	1	0	1	2	1	3	1	3	1	0	1	1	1															1	1
5	E0696 B	low grade with large cells vs cHL	low grade with large cells vs cHL	FULL	low grade with large cells vs cHL	NKTCL	3	3	0	1	1	1	1	2	2	1	1	3		1	1	1	1	1	1	1	1	3	1	0	1	1	1	1	1	1	1	1	1	1	2	1	0	3	3	1		1	1
5	E0697 B	DL	DL	FULL	DL	DLBCL	0	1	3	1	1	1	1	0	1	1	1	3	N/A	1	1	1	1	1					1	0	1	1																1	1
5	E0699 B	PTCL vs cHL	PTCL vs cHL	NONE	PTCL vs cHL	DLBCL	3	1	3	3	1	3	2	3	2	5	1	1	N/A	1	1	1	1	1					1	0	1	1																1	1
5	E0700 B	DL	DL	NONE	DL	DLBCL	3	1	3	3	1	2	2	3	2	0	1	1	N/A	1	2	1	1	1					1	0	1	1																1	1
5	E0701	FL 1-2	FL 1-2	N/A	FL 1-2	FL	3	1	3	3	3	3	1	3	1	0	1	1	N/A	1	1	1	1	1					1	0	1	1																1	1
5	E0702 B	cHL	cHL	FULL	cHL	HL	1	1	1	1	1	1	1	1	1	0	1	3	N/A	1	1	1	1	1					1	0	3	1																1	1
5	E0705 B	ML, SLL/CLL	ML, SLL/CLL	PARTIAL	ML, SLL/CLL	MCL	3	1	3	0	1	1	1	3	1	0	1	1	N/A	1	3	3 (dim)	3	1					1	1	1	1																1	1
6	E0147 B	Classic Hodgkin lymphoma nodular sclerosis subtype	FL 1/2	NONE	Marginal zone lymphoma	MZL	3	1	3	3	1	1	1	3		0.01	1	1	1	1	1	1	1	1	1	1	1	3	1	1	1	1											1					1	1
6	E0706 B	Follicular Lymphoma	FL 1-3A	FULL	Follicular lymphoma, grade 3	FL	2	1	3	3	3	3	1	3		0.01	1	1	1	1		1	1						1	1	1	1											1					1	1
6	E0707 B	Follicular Lymphoma grade 1	FL 1/2	FULL	Follicular lymphoma, grade 1-2	FL	3	1	3	3	3	2	1	3		0.01	1	1	1	1		1	1						1	1	1	1											1					1	1
6	E0708 C	Diffuse Small Cell Lymphoma	ML vs MZL vs DL	PARTIAL	Mantle cell lymphoma	MCL	3	1	3	3	1	1	1	3		0.1	1	1	1	1	3	3	3						1	1	1	1											1					1	1
6	E0709 B	Follicular Lymphoma	DL	NONE	Diffuse large B cell lymphoma, germinal center type	DLBCL	3	1	3	3	1	3	1	2		0.1	1	1	1	1		1	1						1	1	1	1											1					1	1
6	E0710 B	Non hodgkin's B-cell lymphoma	DL	NONE	Diffuse large B cell lymphoma, non-germinal center type	DLBCL	3	1	3	3	1	2	1	3		0.01	1	1	1	1		1	1						1	1	1	1											1					1	1
6	E0712 C	Follicular Lymphoma grade 1	FL 1/2	FULL	Follicular lymphoma, grade 1-2	FL	3	1	3	3	3	1	1	3		1	1	1	1	1		1	1						1	1	1	1											1					1	1
6	E0714 C	Difusse Large cell Lymphoma	DL with plasmacytic diff	FULL	Diffuse large B cell lymphoma, non-germinal center type	DLBCL	3	1	3	3	1	2	3	3		1	1	1	1	1		1	1						1	1	1	1											1					1	1
6	E0715 B	T cell Lymphoma	DL	NONE	Mantle cell lymphoma	MCL	3	1	3	3	1	1	2	3		1	1	1	1	1	3	3	3						1	1	1	1											1					1	1
6	E0717 B	Difusse Large cell Lymphoma	ALCL vs DL	FULL	Diffuse large B cell lymphoma, non-germinal center type	DLBCL	3	1	3	3	1	3	3	2		50	1	1	1	1		1	1						1	1	1	1											1					1	1
6	E0719 B	Histiocyte and Lymphocyte-Rich Diffuse Large B-Cell Lymphoma	DL	PARTIAL	Diffuse large B cell lymphoma, germinal center type	DLBCL	3	1	3	3	3	1	1	2		1	1	1	1	1		1	1						1	1	1	1											1					1	1
6	E0720 B	Classic Hodgkin Lymphoma	cHL	FULL	Classic Hodgkin Lymphoma	HL	1	1	1	2 (dim)	1	1	3	2		N/A	1	3	1	1		1	1						1	3	1	1											1					1	1
6	E0721 B	Non hodgkin's B-cell lymphoma	DL	NONE	Diffuse large B cell lymphoma, germinal center type	DLBCL	3	1	3	3	3	3	1	3		50	1	1	1	1		1	1						1	2	1	1											1					1	1
6	E0724 B	Non hodgkin's B-cell lymphoma	cHL	NONE	Diffuse large B cell lymphoma, non-germinal center type	DLBCL	3	1	3	3	1	2	3	2		0.95	1	1	1	1		1	1						1	1	1	1											1					1	1
6	E0725 B	T cell Lymphoma	cHL	PARTIAL	Classic Hodgkin Lymphoma	HL	1	1	1	3 (dim)	1	1	3	3		N/A	1	3	3	1		1	1						1	3	3	1											1					1	1
6	E0728 B	Difusse Large cell Lymphoma	DL	FULL	Diffuse large B cell lymphoma, germinal center type	DLBCL	3	1	3	3	3	1	1	2		1	1	1	1	1		1	0						1	1	3	1											1					1	1
6	E0730 B	Non hodgkin's B-cell lymphoma	DL	NONE	High grade B cell lymphoma with MYC and BCL2 or BCL6 rearrangements	DLBCL	3	1	3	3	1	2	1	3		1	1	1	1	1		1	1						1	1	1	1											1					1	1
6	E0731 B	Burkitt Lymphoma	pleomorphic large T/B	NONE	Anaplastic large cell lymphoma, ALK positive	TCL	2 (dim)	1	1	1	1	1	3	1		1	1	1	1	1		1	1						1	3	1	3		2	1	1	2	1	1	1	1	1	1	2	1	1		1	1
6	E0732 B	Diffuse Large cell Lymphoma	pleomorphic large T/B	FULL	Diffuse large B cell lymphoma, non-germinal center type	DLBCL	3	1	3	3	1	1	3	3		N/A	1	1	1	1		1	1						1	1	1	1											1					1	1
6	E0733 B	Non hodgkin's B-cell lymphoma	DL	NONE	Diffuse large B cell lymphoma, non-germinal center type	DLBCL	3	1	3	3	1	1	1	1		1	1	1	1	1		1	1		1	1			1	1	1	1											1					1	1
6	E0734 C	Follicular Lymphoma grade II	FL 1/2	FULL	Follicular lymphoma, grade 1-2	FL	3	1	3	3	3	3	1	3		5	1	1	1	1		1	1						1	1	1	1											1					1	1
6	E0735 B	Diffuse Large cell Lymphoma	pleomorphic ML vs DL	NONE	Mantle cell lymphoma	MCL	3	1	3	3	1	1	1	3		10	1	1	1	1	3	3	2 (dim)						1	1	1	1											1					1	1
6	E0736 B	Follicular Lymphoma	FL 1/2	FULL	Follicular lymphoma, grade 1-2	FL	3	1	3	3	3	1	1	3		1	1	1	1	1		1	1						1	1	1	1											1					1	1
6	E0737 B	T cell Lymphoma	cHL	PARTIAL	Classic Hodgkin Lymphoma	HL	1	1	1	3 (dim)	1	1	1	1		N/A	1	3	3	1		1	1						1	3	3	1											1					1	1
6	E0738 B	Non hodgkin's B-cell lymphoma	DL	NONE	Diffuse large B cell lymphoma, non-germinal center type	DLBCL	3	1	3	3	1	1	1	3		1	1	1	1	1		1	1						1	1	1	1											1					1	1
6	E0739 B	Diffuse LargeB-cell Lymphoma	DL	FULL	Diffuse large B cell lymphoma, non-germinal center type	DLBCL	3	1	3	3	1	1	3	3		50	1	1	1	1		1	1						1	1	1	1											1					1	1
6	E0741 B	Non hodgkin's B-cell lymphoma	DL	NONE	Diffuse large B cell lymphoma, non-germinal center type	DLBCL	3	1	3	3	1	2	3	1		N/A	1	1	1	1		1	1						1	1	1	1											1					1	1
6	E0742 B	Lymphoproliferative process	MF large cell transformed	NONE	Diffuse large B cell lymphoma, non-germinal center type	DLBCL	3	1	3	3	2	1	1	0		25	1	0	1	1		0	1						1	0	3	1											1					1	1
6	E0743	Diffuse Small Cell Lymphoma MALT type	MZL	FULL	Marginal zone lymphoma	MZL	3	1	3	3	1	1	3	3		25	1	1	1	1	1	1	1	1	1	1	1	2	1	2	1	1											1					1	1
6	E0744	Follicular Lymphoma grade III	FL 3A	FULL	Follicular lymphoma, grade 3	FL	3	1	3	3	3	1	2	3		1	1	1	1	1		2	1						1	3	1	1											1					1	1
6	E0745 B	Lymphoproliferative process	DL	NONE	Diffuse large B cell lymphoma, non-germinal center type	DLBCL	3	1	3	3	2	3	3	3 (dim)		75	1	1	1	1		1	1						1	1	1	1											1					1	1
6	E0746 B	Non hodgkin's B-cell lymphoma	DL	NONE	EBV positive diffuse large B cell lymphoma, NOS	DLBCL	3	1	3	3	1	1	3	3		50	1	3	1	1		1	1						1	1	1	1											1					1	1
6	E0747 B	Diffuse Large cell Lymphoma	cHL	FULL	Diffuse large B cell lymphoma, non-germinal center type	DLBCL	3	1	3	3	1	1	1	3		25	1	1	1	1		1	1						1	3	1	1											1					1	1
6	E0748 B	T cell Lymphoma	TCL	FULL	Peripheral T cell lymphoma, NOS	TCL	3	3	1	1	1	1	1	1		5	1	3	1	1		1	1						1	3	1	1		3	0	0	0	0	0	0	0	0	1	0	0	0		1	1
6	E0749 B	Non hodgkin's B-cell lymphoma	DL, plasmblastic	NONE	Diffuse large B cell lymphoma, non-germinal center type	DLBCL	3	1	3	3	1	2	3	3		N/A	1	1	1	1		1	1						1	1	1	1											1					1	1
6	E0750 B	Diffuse Small Cell Lymphoma	FL 1/2	PARTIAL	Follicular lymphoma, grade 1-2	FL	3	1	3	3	1	1	1	3		1	1	1	1	1	1	1	1		2	1	1	1	1	0	1	1											1					1	1
6	E0751 B	Diffuse Small Cell Lymphoma	FL 1/2 diffuse pattern	PARTIAL	Mantle cell lymphoma	MCL	3	1	3	3	1	1	1	3		25	1	1	1	1		3	3						1	2	1	1											1					1	1
6	E0752 B	T cell Lymphoma	cHL	PARTIAL	Classic Hodgkin Lymphoma	HL	1	1	1	3 (dim)	1	1	3	2		95	1	3	2	1		1	1						1	2	1	1											1					1	1
6	E0753 B	Non hodgkin's B-cell lymphoma	TCL vs DL	NONE	Diffuse large B cell lymphoma, non-germinal center type	DLBCL	3	1	3	3	1	1	1	3		50	1	1	1	1		1	1						1	2	1	1											1					1	1
6	E0754 B	Diffuse Large cell Lymphoma	DL	FULL	Diffuse large B cell lymphoma, non-germinal center type	DLBCL	3	1	3	3	1	1	1	1		N/A	1	1	1	1		1	1						1	1	1	1											1					1	1
6	E0755 B	Diffuse Small Cell Lymphoma	ML	PARTIAL	Mantle cell lymphoma	MCL	3	1	3	3	1	1	1	3		1	1	1	1	1		3	1						1	1	1	1											1					1	1
6	E0756 B	Non hodgkin's B-cell lymphoma	cHL vs DL	NONE	Diffuse large B cell lymphoma, non-germinal center type	DLBCL	3	1	3	3	1	1	1	3		N/A	1	3	1	1		1	1						1	2	1	1											1					1	1
6	E0757 B	Non hodgkin's B-cell lymphoma	DL	N/A	Diffuse large B cell lymphoma, non-germinal center type	DLBCL	3	1	3	3	1	2	3	3		75	1	1	1	1	1	3	1						1	1	1	1											1					1	1
6	E0758 B	Follicular Hyperplasia	FL 1/2 vs RFH	NONE	Marginal zone lymphoma	MZL	3	1	3	3	1	3	1	3		N/A	1	1	1	1		3	1		1	1	1	2	1	2	1	1											1					1	1
6	E0761 B	NK/T cell Lymphoma	DL, NK	FULL	NK/T cell lymphoma	NKTCL	3	3	1	1	1	1	1	2	3	30	1	3	1	1		1	1	1	1	1	1	3	1	3	1	1	1	3	1	1	1	1	2	1	1	3	2	3	3	2		1	1
6	E0762 B	Non Hodgkin B-cell Lymphoma	DL	NONE	Diffuse large B cell lymphoma, germinal center type	DLBCL	3	1	1	3	3	2	2	3		75	1	1	1	1		1	1						1	1	1	1											1					1	1
6	E0764 B	Diffuse Small Cell Lymphoma	FL vs MZL	PARTIAL	Mantle cell lymphoma	MCL	3	1	3	3	1	1	2	3		1	1	1	1	1	3	3	1						1	1	1	1											1					1	1
6	E0766 B	Diffuse Large cell Lymphoma	DL	FULL	Diffuse large B cell lymphoma, non-germinal center type	DLBCL	3	1	1	3	2	2	1	3		N/A	1	1	1	1		1	1						1	1	1	1											1					1	1
6	E0768 B	Diffuse Large cell Lymphoma	DL	FULL	Diffuse large B cell lymphoma, non-germinal center type	DLBCL	3	1	3	3	1	1	1	0		5	1	1	1	1		1	1						1	1	1	1											1					1	1
6	E0770 B	Diffuse Large cell Lymphoma	DL vs pleomorphic T/B	FULL	Diffuse large B cell lymphoma, non-germinal center type	DLBCL	3	1	3	3	1	1	3	3		95	1	1	1	1		1	1						1	1	1	1											1					1	1
6	E0771 B	Follicular Lymphoma	FL 1/2	NONE	Mantle cell lymphoma	MCL	3	1	3	3	1	1	1	3		1	1	1	1	1	3	3	1						1	1	1	1											1					1	1
6	E0772 B	Lymphoproliferative Process	BL vs HGBL	NONE	Mantle cell lymphoma	MCL	3	1	3	3	1	1	3	3		20	1	1	1	1	3	3	1						1	1	1	1											1					1	1
6	E0773 B	Non Hodgkin B-cell Lymphoma	MZL	PARTIAL	Follicular lymphoma, grade 1-2	FL	3	1	3	3	3	3	1	3		0.25	1	1	1	1		1	1						1	1	1	1											1					1	1
6	E0774 B	Diffuse Large cell Lymphoma	HGBL, BL, RDD vs HLH	PARTIAL	Burkitt lymphoma	Agg BCL	3	1	3	3	3	1	1	1	3	50	1	3	1	1		1	1						1	1	1	1											1					1	1
6	E0776 B	Non Hodgkin´s B- cell Lymphoma	ML vs T cell	PARTIAL	Mantle cell lymphoma	MCL	3	1	3	3	1	1	1	3		1	1	1	1	1	3	3	3						1	1	1	1											1					1	1
6	E0777 B	Non hodgkin's B-cell lymphoma	ML vs FL	PARTIAL	Mantle cell lymphoma	MCL	3	1	3	3	1	1	1	3		1	1	1	1	1	3	3	3						1	1	1	1											1					1	1
6	E0778 B	Lymphoproliferative Process	CLL vs ML	PARTIAL	Mantle cell lymphoma	MCL	3	1	3	3	1	1	1	3		1	1	1	1	1	3	3	3						1	1	1	1											1					1	1
6	E0779 B	Non hodgkin's B-cell lymphoma	DL	NONE	Diffuse large B cell lymphoma, non-germinal center type	DLBCL	3	1	3	3	1	1	1	3		N/A	1	1	1	1		1	1						1	1	1	1											1					1	1
6	E0782 C	Diffuse Large B-cell Lymphoma	DL	PARTIAL	High grade B cell lymphoma with MYC and BCL2 or BCL6 rearrangements	DLBCL	3	1	3	3	1	2	3	3		50	1	1	1	1	1	3	1						1	1	1	1											1					1	1
6	E0783 B	Diffuse Large cell Lymphoma	ML	FULL	Diffuse large B cell lymphoma, germinal center type	DLBCL	3	1	3	3	3	3	1	1		95	1	1	1	1		1	1						1	2	1	1											1					1	1
6	E0784 B	Diffuse small cell Lymphoma	MZL	PARTIAL	Follicular lymphoma, grade 1-2	FL	3	1	3	3	3	3	1	3		<1%	1	1	1	1		1	1						1	1	1	1											1					1	1
6	E0785 B	Diffuse small cell Lymphoma	ML vs CLL	PARTIAL	Mantle cell lymphoma	MCL	3	1	3	3	1	1	1	3		1	1	1	1	1	3	3	3						1	1	1	1											1					1	1
6	E0787 B	Diffuse Large cell Lymphoma	TCL	NONE	Peripheral T cell lymphoma, NOS	TCL	3	3	1	1	1	1	3	3 (dim)		75	1	1	1	1		1	1						1	3	1	1											1					1	1
6	E0788 B	Follicular Lymphoma	MZL	FULL	Follicular lymphoma, grade 1-2	FL	3	1	3	3	1	1	3	3		<1%	1	1	1	1		1	1		3	1	1	2	1	1	1	1											1					1	1
6	E0790 B	Diffuse Large cell Lymphoma	DL	FULL	Diffuse large B cell lymphoma, non-germinal center type	DLBCL	3	1	3	3	1	2	3	3		75	1	1	1	1		1	1						1	3	1	1											1					1	1
6	E0792 A	Non hodgkin's B-cell lymphoma	MZL, ?TCL	NONE	Peripheral T cell lymphoma, NOS	TCL	2	1	1	1	1	1	1	3		5	1	2	1	1		1	1						1	3	1	1		2	1	1	0	0	0	0	0	0	1	0	0	0		1	1
6	E0795 B	Diffuse small cell Lymphoma	MZL	PARTIAL	Mantle cell lymphoma	MCL	3	1	3	3	1	1	1	3		1	1	1	1	1	3	3	3						1	1	1	1											1					1	1
6	E0797 B	Diffuse small cell Lymphoma	FL 1/2	PARTIAL	Mantle cell lymphoma	MCL	3	1	3	3	1	1	1	3		1	1	1	1	1	3	3	3						1	1	1	1											1					1	1
6	E0798 B	Classic Hodgkin Lymphoma	cHL	FULL	Classic Hodgkin Lymphoma	HL	0	1	1	3 (dim)	1	1	1	2		N/A	1	3	3	1		1	1						1	3	3	1											1					1	1
6	E0800 B	Lymphoproliferative Process	large pleomorphic T/B	NONE	Diffuse large B cell lymphoma, germinal center type	DLBCL	3	1	2	2	1	3	1	3	3	N/A	1	1	1	1		1	1						1	1	1	1	2										1					1	1
6	E0802 B	Diffuse small cell Lymphoma	MZL vs FL	PARTIAL	Mantle cell lymphoma	MCL	3	1	3	3	1	1	1	3		25	1	1	1	1	3	3	3						1	1	1	1											1					1	1
6	E0803 B	Diffuse Large cell Lymphoma	viral	FULL	Diffuse large B cell lymphoma, non-germinal center type	DLBCL	3	1	3	3	2	1	2	3		50	1	1	1	1		1	1						1	2	1	1											1					1	1
6	E0805 B	Lymphoproliferative Process	FL 1/2	PARTIAL	Follicular lymphoma, grade 1-2	FL	3	1	3	3	2	1	1	3		N/A	1	2	1	1		1	1		3	3			1	3	1	1											1					1	1
6	E0806 B	Diffuse small cell Lymphoma	small vs cHL	NONE	Classic Hodgkin Lymphoma	HL	1	1	2 (vari)	1	1	1	3	0		N/A	1	3	3	1		1	1						1	3	1	1	3										1					1	1
6	E0807 B	Lymphoproliferative Process	cHL	NONE	Classic Hodgkin Lymphoma	HL	1	1	1	3 (dim)	1	1	1	0		50	1	3	1	1		1	1						1	3	3	1											1					1	1
6	E0809 B	Diffuse Large B-cell Lymphoma	ML	NONE	Mantle cell lymphoma	MCL	3	1	3	3	1	1	1	3		1	1	1	1	1	3	3	3						1	1	1	1											1					1	1
6	E0810 B	Lymphoproliferative Process	FL 1/2	PARTIAL	Follicular lymphoma, grade 1-2	FL	3	1	3	3	3	1	1	3		1	1	1	1	1		1	1						1	1	1	1											1					1	1
6	E0811 B	Diffuse Large cell Lymphoma	DL	FULL	Diffuse large B cell lymphoma, non-germinal center type	DLBCL	3	1	3	3	1	1	1	1		N/A	1	1	1	1		1	1						1	1	1	1											1					1	1
6	E0812 B	T cell Lymphoma	HGBL	FULL	Peripheral T cell lymphoma, NOS	TCL	2 (dim)	3	1	1	2	1	1	3 (dim)		N/A	1	1	1	1	1	1	1	1				3	1	3	1	1		1	1	1	2	1	2	1	1		1					1	1
6	E0813 B	NK/T cell Lymphoma	NK/T (CD56, EBV)	FULL	NK/T cell lymphoma	NKTCL		3	1									3			1																				3		3		3
6	E0814 B	Diffuse small cell Lymphoma	DL arsing from FL	PARTIAL	Mantle cell lymphoma	MCL	3	1	3	3	1	1	2	3		N/A	1	1	1	1	3	3	3						1	1	1	1											1					1	1
6	E0817 B	Diffuse Large B-cell Lymphoma	NK vs TCL vs DL	FULL	Diffuse large B cell lymphoma, NOS	DLBCL	3	0	3	3	0	0	0	3		25	0	0	1	1		0	1						1	0	1	1											0					1	1
6	E0819 B	Classic Hodgkin Lymphoma	cHL	FULL	Classic Hodgkin Lymphoma	HL	1	1	1	2 (dim)	1	1	3	2		N/A	1	3	3	1		1	1						1	3	1	1	3										1					1	1
6	E0820 B	Non hodgkin's B-cell lymphoma	DL	NONE	Anaplastic large cell lymphoma, ALK negative	TCL	0	3	1	1	1	1	3	3		95	1	1	1	1		1	1						1	3	1	1		3	1	1	2	0	0	0	0	0	1	1	1	1		1	1
6	E0821 B	Classic Hodgkin Lymphoma	cHL vs TCL	NONE	Anaplastic large cell lymphoma, ALK positive	TCL	0	1	1	1	1	1	1	1		N/A	1	1	1	1		1	1						1	2	3	2		3	0	0	0	0	0	0	0	0	1					1	1
6	E0822 C	Diffuse Large B-cell Lymphoma	DL	FULL	Diffuse large B cell lymphoma, non-germinal center type	DLBCL	3	1	3	3	1	3	3	3		N/A	1	1	1	1		2	1						1	1	1	1											1					1	1
6	E0823 B	Diffuse Large cell Lymphoma	DL with plasmacytic diff	FULL	Diffuse large B cell lymphoma, non-germinal center type	DLBCL	3	1	3	3	1	1	3	3		N/A	1	1	1	1		1	1						1	1	1	1											1					1	1
6	E0824 B	Lymphoid Hyperplasia	cHL	NONE	Classic Hodgkin Lymphoma	HL	1	1	1	3 (dim)	1	1	3	3 (dim)		N/A	1	3	3	1		1	1						1	3	2	1											1					1	1
6	E0825 B	Lymphoproliferative Process	BL vs HGBL	NONE	B lymphoblastic lymphoma	Agg BCL	0	1	2	3	3	1	1	3		N/A	3	1	1	1		1	1						1	1	1	1											1					1	1
6	E0829 B	Diffuse small cell Lymphoma	DL vs cHL	NONE	Diffuse large B cell lymphoma, non-germinal center type	DLBCL	3	1	3	3	1	1	1	N/A		0	1	1	1	1		1	1						1	1	1	1											1					1	1
6	E0830 B	Classic Hodgkin Lymphoma	cHL	FULL	Classic Hodgkin Lymphoma	HL	0	1	1	2 (dim)	1	1	2	N/A		50	1	1	1	1		1	1						1	1	1	1	3										1					1	1
6	E0832 B	Classic Hodgkin Lymphoma nodular sclerosis	cHL	PARTIAL	Peripheral T cell lymphoma, NOS	TCL	2	1	1	1	1	1	2	N/A		25	1	1	1	1	3	1	1	2					1	2	1	1	1	2	0	0	0	0	0	1	1		1	1	1	1		1	1
6	E0833 B	Non hodgkin's B-cell lymphoma	cHL, DL	NONE	Diffuse large B cell lymphoma, germinal center type	DLBCL	3	1	3	3	3	3	1	NN		10	1	1	1	1		1	1						1	1	1	1											1					1	1
6	E0834 B	Lymphoproliferative Process	cHL, DL	NONE	Diffuse large B cell lymphoma, non-germinal center type	DLBCL	3	1	3	3	1	1	1	N		5	1	1	1	1		1	1						1	1	1	1											1					1	1
6	E0835 B	Lymphoproliferative Process	DL	NONE	Diffuse large B cell lymphoma, non-germinal center type	DLBCL	3	1	3	3	1	3	3	N		5	1	1	1	1		1	1						1	1	1	1											1					1	1
6	E0836 B	Non hodgkin's B-cell lymphoma	DL	NONE	NK/T cell lymphoma	NKTCL	1	1	1	1	1	1	3	3	3	5	1	3	2	1	1	1	1	1	1	1	1	3	1	3	1	1	1	0	1	1	1	1	1	1	1	1	2	3	3	2		1	1
6	E0838 C	Classic Hodgkin Lymphoma	cHL	FULL	Classic Hodgkin Lymphoma	HL	1	1	2	3 (dim)	1	1	3	N/A		1	1	1	1	1		1	1						1	3	3	1											1					1	1
6	E0841 B	T cell Lymphoma ("indolent")	TCL vs cHL	FULL	Peripheral T cell lymphoma, NOS	TCL	3	3	1	1	1	1	1	N/A		10	1	2		1		1	1						1	3	1	1		3	0	0	0	0	0	0	0	0	1	0	0	0		1	1
6	E0842 B	T cell Lymphoma	cHL, DL	NONE	EBV positive diffuse large cell lymphoma, NOS	DLBCL	3	1	3	3	3	1	3	N/A		1	1	3		1		1	1						1	3	1	1											1					1	1
6	E0843 B	Non hodgkin's B-cell lymphoma	MZL	PARTIAL	Marginal zone lymphoma	MZL	3	1	3	3	1	1	1	N/A		<1%	1	1	1	1	1	1	1	1	1	1	1	1	1	1	1	1	3										3					1	1
6	E0845 B	Diffuse small cell Lymphoma	cHL	NONE	Diffuse large B cell lymphoma, non-germinal center type	DLBCL	3	1	3	3	1	1	3	N/A		75	1	1	1	1		1	1						1	1	1	1											1					1	1
6	E0846 B	Diffuse small cell Lymphoma	FL, MCL	PARTIAL	Mantle cell lymphoma	MCL	3	1	3	3	1	1	2	N/A		5	1	1	1	1	3	3	3						1	1	1	1											1					1	1
6	E0847 B	Lymphoproliferative Process	large B/T	NONE	Diffuse large B cell lymphoma, non-germinal center type	DLBCL	3	1	3	3	1	3	3	N/A		50	1	1	1	1		1	1						1	1	1	1											1					1	1
6	E0848 C	Diffuse Large B-cell Lymphoma	DL	FULL	Diffuse large B cell lymphoma, non-germinal center type	DLBCL	3	1	3	3	1	1	1	N/A		1	1	1	1	1		1	1						1	3	1	1											1					1	1
6	E0850 B	Diffuse Large B-cell Lymphoma	DL, HGBL	FULL	Diffuse large B cell lymphoma, non-germinal center type	DLBCL	3	1	3	3	1	1	3	N/A		1	1	1	1	1		1	1						1	1	1	1											1					1	1
6	E0851 B	Diffuse Large cell Lymphoma	FL grade 1/2 and LCH	NONE	Follicular lymphoma, grade 1-2	FL	3	1	3	3	3	3	3	N/A		10	1	1	1	1		1	1						1	1	1	1											1					1	1
6	E0853 B	Diffuse Large cell Lymphoma	DL	FULL	Diffuse large B cell lymphoma, non-germinal center type	DLBCL	3	1	3	3	1	3	3	N/A		50	1	1	1	1		1	1						1	1	1	1											1					1	1
6	E0855 A	Follicular Hyperplasia	FL grade 1/2 vs RFH	FULL	Reactive Follicular Hyperplasia	Nonmalignant	3	1	3	3	1	2	1	N/A		N/A	1	1	1	1		1	1						1	3	1	1											1					1	1
6	E0856	Diffuse Large cell Lymphoma	DL	FULL	Diffuse large B cell lymphoma, germinal center type	DLBCL	3	1	3	3	1	3	2	N/A		N/A	1	1	1	1		1	1						1	1	1	1											1					1	1
6	E0858 B	Diffuse small cell Lymphoma	FL grade 1/2	PARTIAL	Marginal zone lymphoma	MZL	3	1	3	3	1	1	1	N/A		0	1	1	1	1	1	1	1	1	1	1	1	1	1	1	1	1											1					1	1
6	E0862 B	Classic Hodgkin Lymphoma	cHL	FULL	Classic Hodgkin Lymphoma	HL	1	1	1	3 (dim)	1	1	2	N/A		10	1	3		1		1	1						1	3	3	1											1					1	1
6	E0863 B	Diffuse Large B-cell Lymphoma	DL vs carcinoma	FULL	Diffuse large B cell lymphoma, non-germinal center type	DLBCL	3	1	3	3	1	2	3	N/A		50	1	1	1	1		1	1						1	1	1	1											1					1	1
6	E0864 B	Follicular Lymphoma	FL	FULL	Follicular lymphoma, grade 1-2	FL	3	1	3	3	2	3	2	N/A		5	1	1	1	1		1	1						1	1	1	1											1					1	1
6	E0865 B	Classic Hodgkin Lymphoma	cHL	FULL	Classic Hodgkin Lymphoma	HL	1	1	1	1	1	1	1	N/A		0	1	3		1		1	1						1	3	1	1	1										1					1	1
6	E0866 B	Diffuse Large B-cell Lymphoma	DL	FULL	Diffuse large B cell lymphoma, germinal center type	DLBCL	3	1	3	3	3	3	1	N/A		50	1	1	1	1		1	1						1	2	1	1											1					1	1
6	E0869 B	Lymphoproliferative Process	DL vs carcinoma	NONE	Diffuse large B cell lymphoma, non-germinal center type	DLBCL	3	1	3	3	1	1	3	N/A		1	1	1	1	1		1	1						1	1	1	1											1					1	1
6	E0870 B	Classic Hodgkin Lymphoma	cHL	FULL	Classic Hodgkin Lymphoma	HL	1	2	1	3 (dim)	1	1	2	N/A		0	1	3		1		1	1						1	3	3	1											1					1	1
6	E0871 B	Classic Hodgkin Lymphoma	cHL	FULL	Classic Hodgkin Lymphoma	HL	1	2	1	3 (dim)	1	1	1	N/A		0	1	1	1	1		1	1						1	3	2	1											1					1	1
6	E0872 B	Lymphoproliferative Process	DL	NONE	High grade B cell lymphoma with MYC and BCL2 or BCL6 rearrangements	DLBCL	3	1	3	3	1	2	3	N/A		50	1	1	1	1		1	1						1	2	1	1											1					1	1
6	E0873 B	Non hodgkin's B-cell lymphoma	DL	NONE	Diffuse large B cell lymphoma, non-germinal center type	DLBCL	3	1	3	3	1	1	1	N/A		0	1	1	1	1		1	1						1	1	1	1											1					1	1
6	E0874 B	Lymphoproliferative Process	small B, FL	NONE	NK/T cell lymphoma	NKTCL	3	3	1	1	1	1	1	2	3	95	1	3	1	1	1	1	1	1	1	1	1	3	1	1	1	1	1		1	1	1	1	1	1	2	1	3	1	3	2		1	1
6	E0875 B	Classic Hodgkin Lymphoma	cHL	FULL	Classic Hodgkin Lymphoma	HL	1	1	1	3 (dim)	1	1	3	N/A		0	1	3		1		1	1						1	2	3	1											1					1	1
6	E0876 B	T cell Lymphoma	DL	FULL	Anaplastic large cell lymphoma, ALK positive	TCL	1	1	1	1	1	1	3	N/A		75	1	1	1	1		1	1						1	3	1	3											1					1	1
6	E0877 B	Diffuse small cell Lymphoma	DL	NONE	Diffuse large B cell lymphoma, non-germinal center type	DLBCL	3	1	3	3	1	1	3	N/A		50	1	1	1	1		1	1						1	1	1	1											1					1	1
6	E0878 B	T cell Lymphoma	cHL	FULL	Anaplastic large cell lymphoma, ALK negative	TCL	3	3	1	2	1	1	3	N/A		95	1	1	1	1		1	1						1	3	1	1		2	0	0	2	0	0	0	0	0	1	0	3	0		1	1
6	E0879 A	Diffuse small cell Lymphoma	DL	NONE	Diffuse large B cell lymphoma, non-germinal center type	DLBCL	3	1	3	3	1	1	1	N/A		1	1	1	1	1		1	1						1	1	1	1											1					1	1
6	E0880 B	NK/T cell Lymphoma	cHL vs reactive	FULL	NK/T cell lymphoma	NKTCL	3	3	1	1	1	1	1	3	1	50	1	3	1	1	3	1	1	1	1	1	1	3	1	3	1	1	1		1	3	3	1	2	1	1	3	1	2	3	2		1	1
6	E0881 B	Diffuse small cell Lymphoma	necrotizing granulamatous inflam	NONE	Reactive Follicular Hyperplasia	Nonmalignant	3	3	3	3	3	3	1	N/A		N/A	1	1	1	1		1	1						1	1	1	1											1					1	1
6	E0882 B	Lymphoproliferative process	ML	NONE	Nodular lymphocyte predominant Hodgkin lymphoma	HL	3	1	3	3	1	1	1	N/A		1	1	1	1	1		1	1						1	1	1	1	3										1					1	1
6	E0883 B	Diffuse Large Cell Lymphoma	DL	FULL	Diffuse large B cell lymphoma, non-germinal center type	DLBCL	3	1	3	3	2	1	2	N/A		95	1	1	1	1		1	1						1	1	1	1											1					1	1
6	E0884	Diffuse small cell Lymphoma	DL	NONE	Diffuse large B cell lymphoma, germinal center type	DLBCL	3	1	3	3	3	1	1	N/A		10	1	1	1	1		1	1						1	1	1	1											1					1	1
6	E0885 B	Lymphoproliferative process	small B	PARTIAL	Marginal zone lymphoma	MZL	3	1	3	3	1	1	1	N/A		5	1	1	1	1	1	1	1	1	1	1	2	3	1	1	1	1											1					1	1
6	E0886 B	Lymphoproliferative process	DL	NONE	Diffuse large B cell lymphoma, non-germinal center type	DLBCL	3	1	3	3	1	1	3	N/A		75	1	1	1	1		1	1						1	1	1	1											1					1	1
6	E0887 B	Non hodgkin's B-cell lymphoma	DL	NONE	Diffuse large B cell lymphoma, germinal center type	DLBCL	3	1	3	3	3	1	1	N/A		N/A	1	1	1	1		1	1						1	2	1	1											1					1	1
6	E0889	Diffuse small cell Lymphoma	FL 1/2	PARTIAL	Follicular lymphoma, grade 1-2	FL	3	1	3	3	3	3	1	N/A		N/A	1	1	1	1		1	1						1	1	1	1											1					1	1
6	E0890 B	Anaplastic T cell Lymphoma	TCL, ALCL, DL	NONE	Classic Hodgkin Lymphoma	HL	1	1	1	3 (dim)	1	1	3	N/A		25	1	1	1	1	1	1	1					1	1	3	1	1	1										1					1	1
6	E0891 B	Diffuse Large B-cell Lymphoma	DL	FULL	Diffuse large B cell lymphoma, non-germinal center type	DLBCL	3	1	0	3 (dim)	1	1	0	N/A		N/A	1	1	1	1		1	1						1	1	1	1											1					1	1
6	E0892 B	Classic Hodgkin Lymphoma	cHL	FULL	Classic Hodgkin Lymphoma	HL	1	1	1	2 (dim)	1	1	1	N/A		0	1	1	1	1		1	1						1	3	1	1											1					1	1
6	E0893 B	NK/T cell Lymphoma (indolent)	DL	FULL	NK/T cell lymphoma	NKTCL	2	3	1	1	1	1	1	1	2	N/A	1	3	1	1	1	1	1	1	1	1	1	3	1	1	1	1	1		1	1	1	1	1	1	1	1	3	1	3	3		1	1
6	E0894 B	NK/T cell Lymphoma	NK	FULL	NK/T cell lymphoma	NKTCL	3	3	1	1	1	3	1	3	2	10	1	3	1	1	2	1	1	1	1	1	1	3	1	3	1	1	1		2	1	2	1	2	1	1	1	3	2	3	2		1	1
6	E0895 B	Diffuse small cell Lymphoma	FL 1/2	PARTIAL	Follicular lymphoma, grade 1-2	FL	3	1	3	3	3	1	1	N/A		0	1	1	1	1		1	1						1	1	1	1											1					1	1
6	E0896 B	Non hodgkin's B-cell lymphoma	cHL	NONE	Diffuse large B cell lymphoma, non-germinal center type	DLBCL	3	1	2	3	1	1	1	N/A		N/A	1	1	1	1		1	1						1	1	1	1											1					1	1
6	E0897 B	Diffuse Large cell Lymphoma	TCL, DL	FULL	Diffuse large B cell lymphoma, non-germinal center type	DLBCL	3	1	3	3	1	1	2	N/A		95	1	1	1	1		1	1						1	1	1	1											1					1	1
6	E0901 C	Classic Hodgkin Lymphoma nodular sclerosis	cHL	FULL	Classic Hodgkin Lymphoma	HL	1	1	1	2 (dim)	1	1	3	N/A		0	1	1	1	1		1	1						1	3	1	1											1					1	1
6	E0903 B	Classic Hodgkin Lymphoma	cHL	FULL	Classic Hodgkin Lymphoma	HL	1	1	1	2 (dim)	1	1	3	N/A		0	1	3		1		1	1						1	3	1	1											1					1	1
6	E0905 B	Diffuse small cell Lymphoma	FL 1/2 with cHL cell	NONE	Diffuse large B cell lymphoma, non-germinal center type	DLBCL	3	1	3	3	1	1	1	N/A		0	1	1	1	1		1	1						1	1	1	1											1					1	1
6	E0908 B	Diffuse small cell Lymphoma	ML vs CLL	PARTIAL	Mantle cell lymphoma	MCL	3	1	3	3	1	1	1	N/A		0	1	1	1	1	3	3	2 (dim)						1	1	1	1											1					1	1
6	E0909 B	Mantle cell Lymphoma	ML vs CLL	FULL	Mantle cell lymphoma	MCL	3	1	3	3	1	1	1	N/A		0	1	1	1	1	3	3	1						1	1	1	1											1					1	1
6	E0913 B	Diffuse Large B-cell Lymphoma	TCL	FULL	Diffuse large B cell lymphoma, NOS	DLBCL	3	3	3	3	0	2	0	N/A		50	1	1	1	1		1	1						1	1	1	1											1					1	1
6	E0915 B	Diffuse Large B-cell Lymphoma	DL	FULL	Diffuse large B cell lymphoma, non-germinal center type	DLBCL	3	1	3	3	1	1	1	N/A		N/A	1	1	1	1		1	1						1	1	1	1											1					1	1
6	E0917 B	NK/T cell Lymphoma	DL	FULL	NK/T cell lymphoma	NKTCL	3	3	1	1	1	1	1	1	2	0	1	3	2	1	1	1	1	1	2	1	1	3	1	3	1	1	1		3	1	1	1	3	1	3	3	2	3	3	1		1	1
6	E0919 B	Mantle cell Lymphoma	ML	FULL	Mantle cell lymphoma	MCL	3	1	3	3	1	1	1	N/A		0	1	1	1	1	3	3	1						1	1	1	1											1					1	1
6	E0920 B	Diffuse small cell Lymphoma	FL 1/2, MCL	PARTIAL	Mantle cell lymphoma	MCL	3	1	3	3	2	1	1	N/A		0	1	1	1	1	3	3	1						1	1	1	1											1					1	1
6	E0921 B	Diffuse Large B-cell Lymphoma	DL vs plasmacytic	FULL	Diffuse large B cell lymphoma, non-germinal center type	DLBCL	3	1	3	3	2	3	3	N/A		50	1	1	1	1		1	1						1	1	1	1											1					1	1
6	E0923 B	Classic Hodgkin Lymphoma nodular sclerosis	cHL, TCL with secondary B	FULL	Classic Hodgkin Lymphoma	HL	0	1	2	2 (dim)	1	1	3	N/A		0	1	3		1		1	1						1	3	1	1											1					1	1
6	E0924 B	Lymphoproliferative process	FL 1/2 diffuse pattern, MCL	PARTIAL	Mantle cell lymphoma	MCL	3	1	3	3	1	1	1	N/A		1	1	1	1	1	3	3	3						1	1	1	1											1					1	1
6	E0925 B	Classic Hodgkin Lymphoma	cHL	FULL	Classic Hodgkin Lymphoma	HL	1	1	1	3 (dim)	1	1	3	N/A		0	1	3		1		1	1						1	3	3	1											1					1	1
6	E0928 B	Diffuse Large Cell Lymphoma	TCL vs cHL	FULL	Diffuse large B cell lymphoma, non-germinal center type	DLBCL	3	1	3	3	1	1	1	N/A		N/A	1	1	1	1		1	1						1	1	1	1											1					1	1
6	E0930 A	Follicular Lymphoma grade I	DL rasing from FL, MCL	NONE	Mantle cell lymphoma	MCL	3	1	0	3 (dim)	1	1	1	N/A		N/A	1	1	1	1	3 (dim)	3	1						1	1	1	1											1					1	1
6	E0932 B	Diffuse Large B-cell Lymphoma	DL	FULL	Diffuse large B cell lymphoma, non-germinal center type	DLBCL	1	1	3	3	1	1	1	N/A		0	1	1	1	1		1	1						1	1	1	1											1					1	1
6	E0933 B	Classic Hodgkin Lymphoma	cHL	FULL	Classic Hodgkin Lymphoma	HL	1	2	1	2 (dim)	1	1	3	N/A		50	1	2	1	1	1	1	1						1	3	3	1											1					1	1
8	E0968 B (E0698B)	NK/T cell lymphoma	NK/T cell lymphoma	FULL	NK/T cell lymphoma	NKTCL	3 (dim)	3	1	1	1	1	3	1	3	80	1	3	2	1	1	1	1	1	1	1	1	3	1	3	1	1	1	3	1	1	1	1	1	1	3	1	3	3 (dim)	3	3		1	1
8	E0970 B	NK/T cell lymphoma	NK/T cell lymphoma	FULL	NK/T cell lymphoma	NKTCL	2 (vari)	3	1	1	1	1	1	3	3	10	1	3	1	1	1	1	1	1	1	1	1	3	1	2	1	1	1	3	1	1	1	1	2	1	2	1	3	3	3	3		1	1
8	E0971 B	NK/T cell lymphoma	NK/T cell lymphoma	FULL	NK/T cell lymphoma	NKTCL		3	1									3			1																				3		2		3
8	E0972 B	NK/T cell lymphoma	NK/T cell lymphoma	FULL	NK/T cell lymphoma	NKTCL	3	3	1	1	1	1	1	3	1	0	1	3	1	1	1	1	1	1	1	1	1	3	1	1	1	1	1	3	1	1	1	1	1	1	1	3	1	3	3	1		1	1
8	E0973 B	NK/T cell lymphoma	Atypical, focally involved by possible NK/T	FULL	NK/T cell lymphoma	NKTCL		3	1									3			2																				3		3		3
8	E0974 B	NK/T cell lymphoma (indolent)	NK/T cell lymphoma	FULL	NK/T cell lymphoma	NKTCL	3	3	1	1	1	1	1	1	1	5	1	2	1	1	1	1	1	1	1	1	1	3	1	2	1	1	1	3	1	1	1	1	1	1	1	2	3	3	3	3		1	1
8	E0975 B	NK/T cell lymphoma (indolent)	NK/T cell lymphoma	FULL	NK/T cell lymphoma	NKTCL	3	3	1	1	1	1	1	1	1	0	1	3	1	1	2	1	1	1	1	1	1	3	1	1	1	1	1	3	1	1	1	1	1	1	1	3	3	3	1	1		1	1
8	E0976 B	NK/T cell lymphoma	NK/T cell lymphoma	FULL	NK/T cell lymphoma	NKTCL	3	3	1	1	1	1	1	1	2	40	1	3	1	1	1	1	1	1	1	1	1	3	1	3	1	1	1	3	1	1	1	1	1	1	1	1	3	3	3	3		1	1
8	E0977 B	NK/T cell lymphoma (indolent)	NK/T cell lymphoma	FULL	NK/T cell lymphoma	NKTCL	3	3	1	1	1	1	1	1	1	30	1	3	1	1	1	1	1	1	1	1	1	3	1	3	1	1	1	3	1	1	1	1	1	1	1	1	3	3	3	1		1	1
8	E0978 B	NK/T cell lymphoma	NK/T cell lymphoma	FULL	NK/T cell lymphoma	NKTCL	3	1	1	1	1	1	1	1	1	0	1	3	0	1	3	1	1	1	1	1	1	3	1	3	1	1	1	3	1	1	1	1	1	1	0	1	3	3	3	3		1	1
8	E0980 B	NK/T cell lymphoma (indolent)	NK/T cell lymphoma	FULL	NK/T cell lymphoma	NKTCL		3	1									3			0																				1		2		3			1	1
8	E0981 B	NK/T cell lymphoma	NK/T cell lymphoma	FULL	NK/T cell lymphoma	NKTCL	3 (vari)	3	1	1	1	1	2	3	3	75	1	3	2	1	1	1	1	1	1	1	1	3	1	3	1	1	1	3	1	1	2	1	1	1	2	1	3	3	3	3		1	1
8	E0982 B	NK/T cell lymphoma	NK/T cell lymphoma	FULL	NK/T cell lymphoma	NKTCL	3	3	1	1	1	1	1	3	1	5	1	3	1	1	1	1	1	1	1	1	1	3	1	1	1	1	1	3	1	1	1	1	1	1	1	3	2	3	2	2		1	1
8	E0983 B	NK/T cell lymphoma	NK/T cell lymphoma	FULL	NK/T cell lymphoma	NKTCL	3	3	1	1	1	1	1	1	1	0	1	2	1	1	1	1	1	1	1	1	1	3	1	1	1	1	1	2	1	1	1	1	1	1	1	1	2	3	3	1		1	1
8	E0984 B	NK/T cell lymphoma	NK/T cell lymphoma	FULL	NK/T cell lymphoma	NKTCL	3	3	1	1	1	1	1	1	1	0	1	3	3	1	1	1	1	1	1	1	1	3	1	3	1	1	1	3	1	1	1	1	1	1	1	1	3	3	3	3		1	1
8	E0985 B	NK/T cell lymphoma	NK/T cell lymphoma	FULL	NK/T cell lymphoma	NKTCL	3	3	1	1	1	1	1	1	2	0	1	3	2	1	1	1	1	1	1	1	1	3	1	2	1	1	1	3	1	1	1	1	1	1	1	1	2	3	3	1		1	1
8	E0986 B	NK/T cell lymphoma (indolent)	NK/T cell lymphoma	FULL	NK/T cell lymphoma	NKTCL	3 (dim)	3	1	1	1	1	3	1	3	5	1	3	1	1	1	1	1	1	1	1	1	3	1	2	1	1	1	3	1	1	1	1	1	1	1	1	3	3	3	3		1	1
8	E0987 B	NK/T cell lymphoma	NK/T cell lymphoma	FULL	NK/T cell lymphoma	NKTCL	3	3	1	1	1	1	3	3	3	0	1	3	1	1	1	1	1	1	1	1	1	3	1	3	1	1	1	3	1	1	1	1	1	1	2	1	3	3	3	3		1	1
8	E0988 B	NK/T cell lymphoma	NK/T cell lymphoma	FULL	NK/T cell lymphoma	NKTCL	2	3	1	1	1	1	2	3	3	10	1	3	1	1	1	1	1	1	1	1	1	3	1	2	1	1	1	3	1	1	1	1	1	1	1	1	3	3	3	3		1	1
8	E0989 B	NK/T cell lymphoma	NK/T cell lymphoma	FULL	NK/T cell lymphoma	NKTCL	3 (dim)	3	1	1	1	1	2	2	3	40	1	3	1	1	1	1	1	1	1	1	1	3	1	3	1	1	1	3	1	1	1	1	1	1	2	1	3	3	3	3		1	1
8	E0990 B	NK/T cell lymphoma	NK/T cell lymphoma	FULL	NK/T cell lymphoma	NKTCL	3	2	1	1	1	1	1	2	2	30	1	3	3	1	3	1	1	1	1	1	1	3	1	1	1	1	1	3	2	1	1	1	2	1	3	1	3	3	3	3		1	1
8	E0991 B	NK/T cell lymphoma (indolent)	NK/T cell lymphoma	FULL	NK/T cell lymphoma	NKTCL	3	3	1	1	1	1	2	3	3	40	1	3	1	1	1	1	1	1	1	1	1	3	1	3	1	1	1	3	1	1	1	1	1	1	1	1	0	3	3	3		1	1
[truncated: 4 more columns]
